# Supplementary material for: Solving the puzzling competition of the thermal C2–C6 vs Myers–Saito cyclization of enyne-carbodiimides
Source: publisher site journal article supplement (doi:10.3762/bjoc.12.6), 2016-01-11
Supplement: Additional file 1 [file 1860-5397-12-6-S1.pdf]

# Supporting Information

for

## Solving the puzzling competition of the thermal C<sup>2</sup>–C<sup>6</sup> vs Myers–Saito cyclization of enyne-carbodiimides

Anup Rana, Mehmet Emin Cinar, Debabrata Samanta and Michael Schmittel\*

Address: Department of Chemistry and Biology, Universität Siegen, Adolf-Reichwein-Str. 2,  
D-57068 Siegen, Germany

Email: Michael Schmittel - [schmittel@chemie.uni-siegen.de](mailto:schmittel@chemie.uni-siegen.de)

\*Corresponding author

### Characterization and computational data

Table of contents:

|                                                     |        |
|-----------------------------------------------------|--------|
| <sup>1</sup> H and <sup>13</sup> C NMR spectra..... | S2–S3  |
| Computational data.....                             | S4–S22 |

**$^1\text{H}$  and  $^{13}\text{C}$  NMR spectra:**

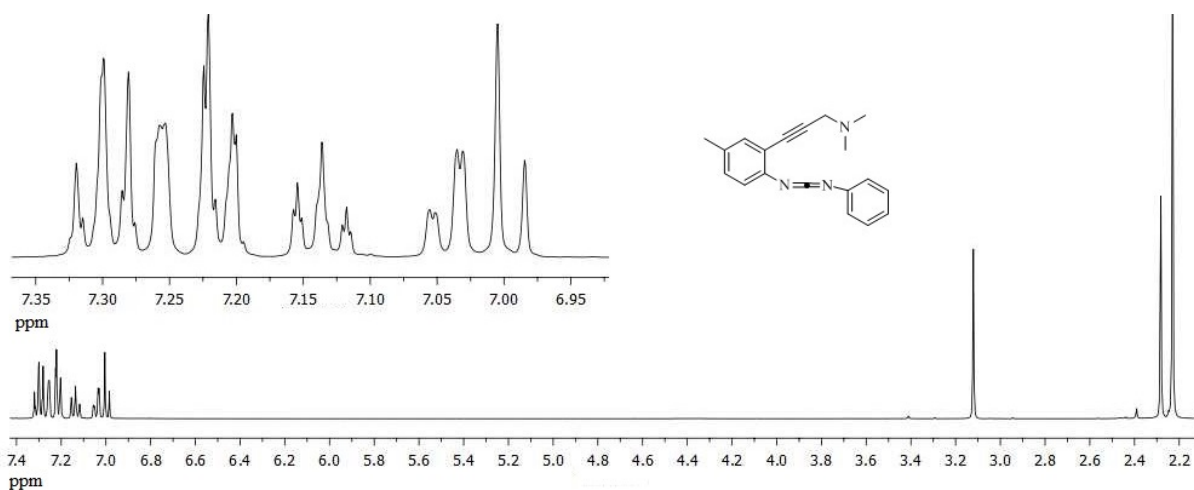

**Figure S1.**  $^1\text{H}$  NMR spectrum (400 MHz,  $\text{CDCl}_3$ ) of **11**.

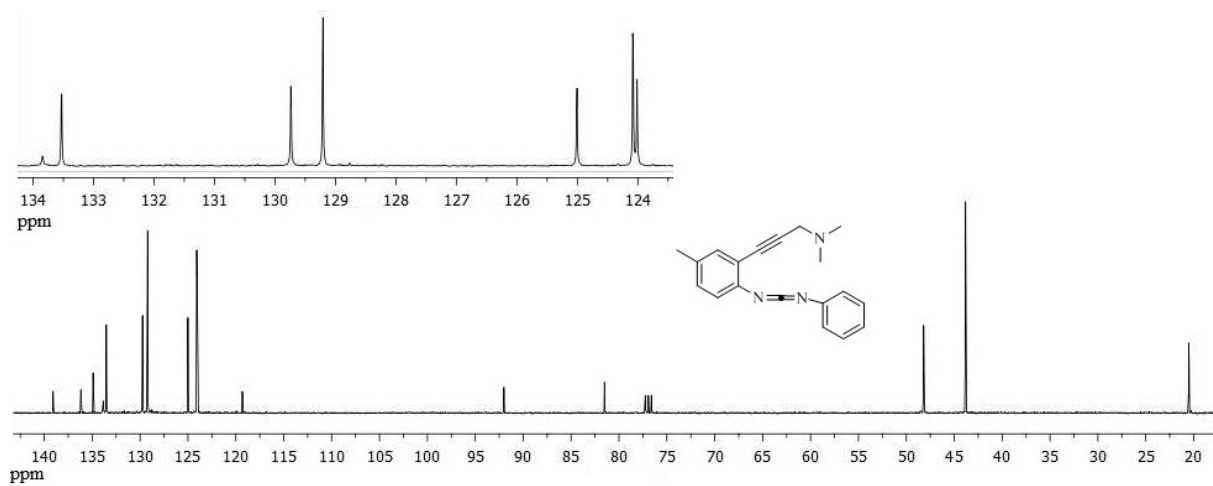

**Figure S2.**  $^{13}\text{C}$  NMR spectrum (100 MHz,  $\text{CDCl}_3$ ) of **11**.

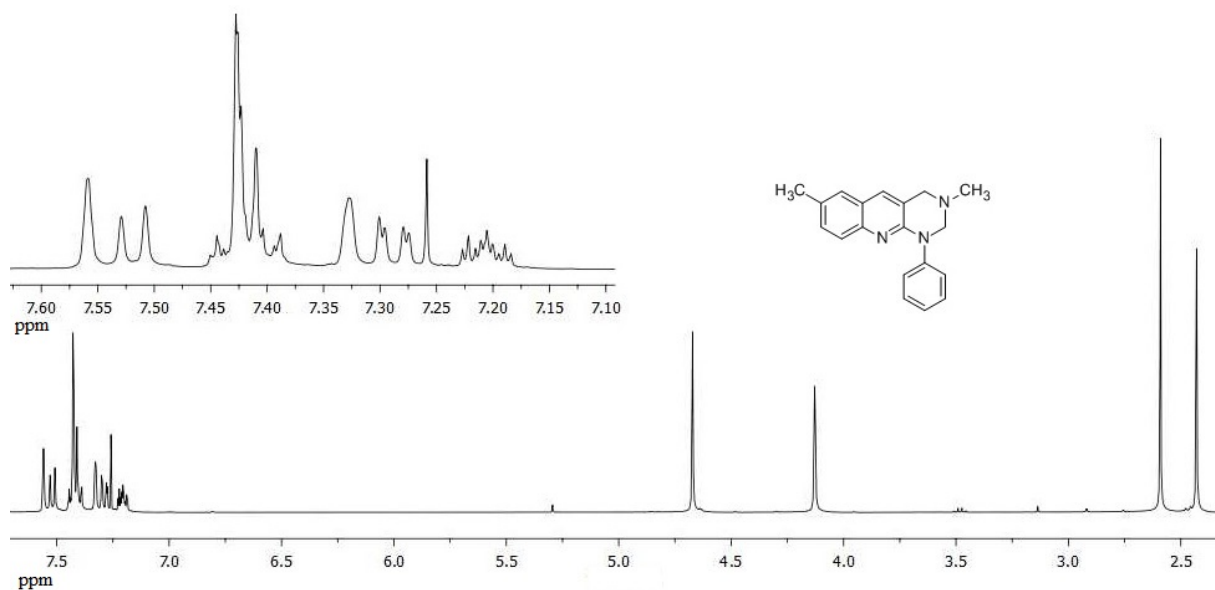

**Figure S3.** <sup>1</sup>H NMR spectrum (400 MHz, CDCl<sub>3</sub>) of **12**.

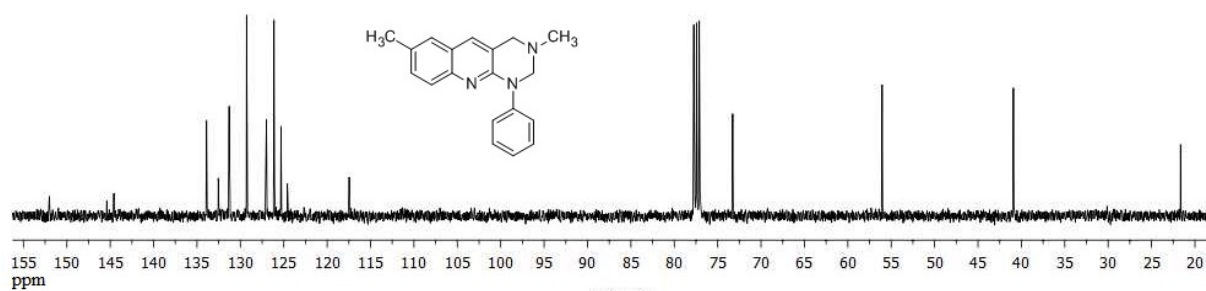

**Figure S4.** <sup>13</sup>C NMR spectrum (100 MHz, CDCl<sub>3</sub>) of **12**.

## Computational Data

### Coordinates:

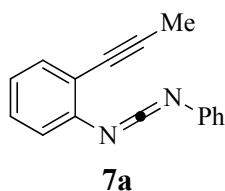

|                                              |                             |
|----------------------------------------------|-----------------------------|
| Zero-point correction=                       | 0.225855 (Hartree/Particle) |
| Thermal correction to Energy=                | 0.242360                    |
| Thermal correction to Enthalpy=              | 0.243304                    |
| Thermal correction to Gibbs Free Energy=     | 0.178143                    |
| Sum of electronic and zero-point Energies=   | -725.873308                 |
| Sum of electronic and thermal Energies=      | -725.856803                 |
| Sum of electronic and thermal Enthalpies=    | -725.855858                 |
| Sum of electronic and thermal Free Energies= | -725.921020                 |

|   |              |              |              |
|---|--------------|--------------|--------------|
| C | -3.433438000 | -1.713491000 | -0.006187000 |
| C | -2.327588000 | -0.843160000 | -0.135642000 |
| C | -2.512120000 | 0.570474000  | 0.033380000  |
| C | -3.818849000 | 1.047367000  | 0.326207000  |
| C | -4.907279000 | 0.171249000  | 0.447488000  |
| C | -4.713140000 | -1.214910000 | 0.279830000  |
| H | -3.263102000 | -2.785169000 | -0.137452000 |
| H | -3.958957000 | 2.123983000  | 0.455406000  |
| H | -5.555826000 | -1.906313000 | 0.372953000  |
| C | -1.421784000 | 1.487190000  | -0.085060000 |
| C | -0.513026000 | 2.305302000  | -0.184145000 |
| C | 0.058698000  | -1.025134000 | -0.641431000 |
| C | 0.586520000  | 3.264401000  | -0.325233000 |
| H | 1.007767000  | 3.544285000  | 0.657608000  |
| H | 1.406903000  | 2.839629000  | -0.930542000 |
| N | -1.086750000 | -1.436690000 | -0.417005000 |
| N | 1.215964000  | -0.859662000 | -1.050825000 |
| C | 2.432380000  | -0.636292000 | -0.368526000 |
| C | 3.602767000  | -0.479544000 | -1.146501000 |
| C | 2.519257000  | -0.573838000 | 1.044706000  |
| C | 4.841870000  | -0.264191000 | -0.519159000 |
| H | 3.522681000  | -0.533692000 | -2.235492000 |
| C | 3.762921000  | -0.357645000 | 1.661209000  |
| H | 1.614082000  | -0.694005000 | 1.647404000  |
| C | 4.929510000  | -0.201388000 | 0.885486000  |
| H | 5.741767000  | -0.146624000 | -1.130873000 |
| H | 3.819976000  | -0.312089000 | 2.753471000  |

|   |              |              |              |
|---|--------------|--------------|--------------|
| H | 5.895353000  | -0.033996000 | 1.371255000  |
| H | 0.246412000  | 4.192370000  | -0.819606000 |
| H | -5.901748000 | 0.567743000  | 0.672132000  |

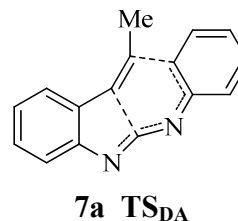

|                                              |                             |
|----------------------------------------------|-----------------------------|
| Zero-point correction=                       | 0.225354 (Hartree/Particle) |
| Thermal correction to Energy=                | 0.239847                    |
| Thermal correction to Enthalpy=              | 0.240791                    |
| Thermal correction to Gibbs Free Energy=     | 0.183991                    |
| Sum of electronic and zero-point Energies=   | -725.832160                 |
| Sum of electronic and thermal Energies=      | -725.817667                 |
| Sum of electronic and thermal Enthalpies=    | -725.816723                 |
| Sum of electronic and thermal Free Energies= | -725.873523                 |

|   |              |              |              |
|---|--------------|--------------|--------------|
| C | -3.844592000 | -1.204484000 | 0.250038000  |
| C | -2.468587000 | -0.913014000 | 0.178971000  |
| C | -2.039293000 | 0.419932000  | -0.124537000 |
| C | -2.966914000 | 1.443814000  | -0.368681000 |
| C | -4.344066000 | 1.141047000  | -0.299110000 |
| C | -4.770517000 | -0.170494000 | 0.006063000  |
| H | -4.173908000 | -2.222702000 | 0.472850000  |
| H | -2.635973000 | 2.461071000  | -0.599774000 |
| H | -5.841872000 | -0.389527000 | 0.054886000  |
| C | -0.567278000 | 0.452338000  | -0.079907000 |
| C | 0.370278000  | 1.328536000  | -0.114402000 |
| C | -0.270613000 | -1.251266000 | 0.126560000  |
| C | 1.041864000  | 2.626133000  | -0.194138000 |
| H | 1.249924000  | 3.042952000  | 0.808066000  |
| H | 1.998911000  | 2.577990000  | -0.744694000 |
| N | -1.425626000 | -1.818024000 | 0.390142000  |
| N | 0.913393000  | -1.720855000 | -0.155308000 |
| C | 2.064225000  | -1.002033000 | -0.016411000 |
| C | 3.128431000  | -1.214086000 | -0.954568000 |
| C | 2.251633000  | -0.020089000 | 1.016434000  |
| C | 4.303725000  | -0.472526000 | -0.870627000 |
| H | 2.980611000  | -1.965049000 | -1.735096000 |
| C | 3.469777000  | 0.698330000  | 1.103933000  |
| H | 1.530040000  | 0.036517000  | 1.833329000  |
| C | 4.480760000  | 0.494592000  | 0.159503000  |
| H | 5.103163000  | -0.637490000 | -1.599788000 |
| H | 3.620644000  | 1.404803000  | 1.926688000  |

|   |              |             |              |
|---|--------------|-------------|--------------|
| H | 5.419473000  | 1.052916000 | 0.226295000  |
| H | 0.383014000  | 3.339932000 | -0.729679000 |
| H | -5.081394000 | 1.930358000 | -0.471662000 |

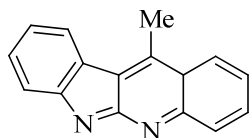

**9aDA**

|                                              |                             |
|----------------------------------------------|-----------------------------|
| Zero-point correction=                       | 0.229515 (Hartree/Particle) |
| Thermal correction to Energy=                | 0.243123                    |
| Thermal correction to Enthalpy=              | 0.244067                    |
| Thermal correction to Gibbs Free Energy=     | 0.189452                    |
| Sum of electronic and zero-point Energies=   | -725.888700                 |
| Sum of electronic and thermal Energies=      | -725.875092                 |
| Sum of electronic and thermal Enthalpies=    | -725.874148                 |
| Sum of electronic and thermal Free Energies= | -725.928763                 |

|   |              |              |              |
|---|--------------|--------------|--------------|
| C | -3.756643000 | -1.316440000 | -0.067689000 |
| C | -2.386955000 | -1.006004000 | 0.001936000  |
| C | -1.932403000 | 0.360122000  | -0.021522000 |
| C | -2.868155000 | 1.404829000  | -0.134327000 |
| C | -4.241832000 | 1.086821000  | -0.202306000 |
| C | -4.679115000 | -0.256925000 | -0.166914000 |
| H | -4.081793000 | -2.360254000 | -0.050709000 |
| H | -2.559453000 | 2.452530000  | -0.182907000 |
| H | -5.749956000 | -0.475873000 | -0.224508000 |
| C | -0.468659000 | 0.260071000  | 0.083570000  |
| C | 0.568063000  | 1.141219000  | 0.196979000  |
| C | -0.219224000 | -1.219056000 | 0.112022000  |
| C | 0.423144000  | 2.644905000  | 0.249614000  |
| H | -0.608416000 | 2.948463000  | 0.474037000  |
| H | 1.082268000  | 3.084529000  | 1.020528000  |
| N | -1.333709000 | -1.940604000 | 0.084710000  |
| N | 1.034818000  | -1.790139000 | 0.119688000  |
| C | 2.068674000  | -0.970020000 | 0.154957000  |
| C | 3.400757000  | -1.526108000 | 0.001767000  |
| C | 1.965099000  | 0.549535000  | 0.396288000  |
| C | 4.481537000  | -0.722297000 | -0.270003000 |
| H | 3.482339000  | -2.616553000 | 0.010267000  |
| C | 3.143139000  | 1.332664000  | -0.166432000 |
| H | 2.118389000  | 0.631942000  | 1.507691000  |
| C | 4.332251000  | 0.719543000  | -0.418374000 |
| H | 5.465474000  | -1.170245000 | -0.439867000 |
| H | 3.040240000  | 2.414805000  | -0.281970000 |
| H | 5.191653000  | 1.306769000  | -0.757316000 |

|   |              |             |              |
|---|--------------|-------------|--------------|
| H | 0.709444000  | 3.108443000 | -0.714572000 |
| H | -4.976034000 | 1.893499000 | -0.288851000 |

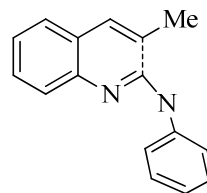

**7a\_TSMS**

|                                              |                             |
|----------------------------------------------|-----------------------------|
| Zero-point correction=                       | 0.225251 (Hartree/Particle) |
| Thermal correction to Energy=                | 0.239993                    |
| Thermal correction to Enthalpy=              | 0.240937                    |
| Thermal correction to Gibbs Free Energy=     | 0.181927                    |
| Sum of electronic and zero-point Energies=   | -725.835296                 |
| Sum of electronic and thermal Energies=      | -725.820554                 |
| Sum of electronic and thermal Enthalpies=    | -725.819610                 |
| Sum of electronic and thermal Free Energies= | -725.878619                 |

|   |              |              |              |
|---|--------------|--------------|--------------|
| C | -3.178306000 | -1.652199000 | -0.520093000 |
| C | -2.232728000 | -0.602828000 | -0.356139000 |
| C | -2.686863000 | 0.631303000  | 0.273924000  |
| C | -4.034665000 | 0.757198000  | 0.697278000  |
| C | -4.934281000 | -0.297374000 | 0.515350000  |
| C | -4.501063000 | -1.500958000 | -0.093501000 |
| H | -2.836073000 | -2.578031000 | -0.989424000 |
| H | -4.353403000 | 1.692347000  | 1.165394000  |
| H | -5.208179000 | -2.324191000 | -0.233535000 |
| C | -1.658659000 | 1.585949000  | 0.379786000  |
| C | -0.407586000 | 1.664087000  | 0.047760000  |
| C | 0.010870000  | 0.102239000  | -0.669957000 |
| C | 0.688804000  | 2.683520000  | 0.084049000  |
| H | 1.526616000  | 2.358297000  | 0.722961000  |
| H | 1.094960000  | 2.847617000  | -0.928258000 |
| N | -0.940189000 | -0.787166000 | -0.780049000 |
| N | 1.238806000  | 0.141623000  | -1.106786000 |
| C | 2.397477000  | -0.159674000 | -0.416988000 |
| C | 3.643499000  | 0.066938000  | -1.074811000 |
| C | 2.410595000  | -0.729479000 | 0.894200000  |
| C | 4.849790000  | -0.277883000 | -0.451754000 |
| H | 3.627476000  | 0.500917000  | -2.078301000 |
| C | 3.625461000  | -1.063020000 | 1.507286000  |
| H | 1.462023000  | -0.906217000 | 1.409465000  |
| C | 4.851256000  | -0.841735000 | 0.842265000  |
| H | 5.796157000  | -0.105470000 | -0.973870000 |
| H | 3.620009000  | -1.500439000 | 2.510892000  |

|   |              |              |             |
|---|--------------|--------------|-------------|
| H | 5.795579000  | -1.104415000 | 1.328007000 |
| H | 0.294776000  | 3.632915000  | 0.478349000 |
| H | -5.971863000 | -0.191019000 | 0.844248000 |

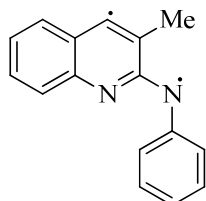

**7a\_INT<sub>MS</sub> (Singlet)**

|                                              |                             |
|----------------------------------------------|-----------------------------|
| Zero-point correction=                       | 0.226791 (Hartree/Particle) |
| Thermal correction to Energy=                | 0.241419                    |
| Thermal correction to Enthalpy=              | 0.242363                    |
| Thermal correction to Gibbs Free Energy=     | 0.184335                    |
| Sum of electronic and zero-point Energies=   | -725.842808                 |
| Sum of electronic and thermal Energies=      | -725.828180                 |
| Sum of electronic and thermal Enthalpies=    | -725.827236                 |
| Sum of electronic and thermal Free Energies= | -725.885264                 |

|   |              |              |              |
|---|--------------|--------------|--------------|
| C | -2.334812000 | -1.950713000 | -0.336429000 |
| C | -1.816079000 | -0.624259000 | -0.167447000 |
| C | -2.770430000 | 0.459705000  | 0.100296000  |
| C | -4.163456000 | 0.169769000  | 0.155299000  |
| C | -4.620358000 | -1.136510000 | -0.011301000 |
| C | -3.699936000 | -2.198913000 | -0.251925000 |
| H | -1.617368000 | -2.753476000 | -0.528052000 |
| H | -4.863388000 | 0.989689000  | 0.339630000  |
| H | -4.075408000 | -3.219021000 | -0.378139000 |
| C | -2.166252000 | 1.722187000  | 0.244393000  |
| C | -0.843192000 | 2.012056000  | 0.145951000  |
| C | 0.025197000  | 0.839607000  | -0.162176000 |
| C | -0.232999000 | 3.381983000  | 0.371159000  |
| H | 0.442732000  | 3.376486000  | 1.244278000  |
| H | 0.376129000  | 3.680855000  | -0.498622000 |
| N | -0.479634000 | -0.412353000 | -0.294574000 |
| N | 1.342294000  | 1.122409000  | -0.356429000 |
| C | 2.364099000  | 0.236425000  | -0.125452000 |
| C | 3.634246000  | 0.574765000  | -0.706594000 |
| C | 2.286389000  | -0.951040000 | 0.682436000  |
| C | 4.745795000  | -0.253337000 | -0.537456000 |
| H | 3.691416000  | 1.490933000  | -1.300350000 |
| C | 3.415354000  | -1.757224000 | 0.860521000  |
| H | 1.342971000  | -1.206582000 | 1.164510000  |
| C | 4.645340000  | -1.425221000 | 0.248187000  |
| H | 5.699282000  | 0.011401000  | -1.004861000 |

|   |              |              |             |
|---|--------------|--------------|-------------|
| H | 3.344711000  | -2.653128000 | 1.485654000 |
| H | 5.520881000  | -2.064990000 | 0.394430000 |
| H | -1.021929000 | 4.131350000  | 0.539700000 |
| H | -5.692086000 | -1.349591000 | 0.042067000 |

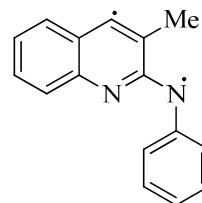

**7a\_INT<sub>MS</sub> (Triplet)**

|                                              |                             |
|----------------------------------------------|-----------------------------|
| Zero-point correction=                       | 0.227053 (Hartree/Particle) |
| Thermal correction to Energy=                | 0.241637                    |
| Thermal correction to Enthalpy=              | 0.242581                    |
| Thermal correction to Gibbs Free Energy=     | 0.183397                    |
| Sum of electronic and zero-point Energies=   | -725.841279                 |
| Sum of electronic and thermal Energies=      | -725.826695                 |
| Sum of electronic and thermal Enthalpies=    | -725.825751                 |
| Sum of electronic and thermal Free Energies= | -725.884935                 |

|   |              |              |              |
|---|--------------|--------------|--------------|
| C | -2.331005000 | -1.960741000 | -0.290389000 |
| C | -1.823782000 | -0.627028000 | -0.134805000 |
| C | -2.791121000 | 0.459845000  | 0.066445000  |
| C | -4.181665000 | 0.159445000  | 0.117772000  |
| C | -4.626767000 | -1.153491000 | -0.029876000 |
| C | -3.696124000 | -2.214851000 | -0.236425000 |
| H | -1.605238000 | -2.762573000 | -0.452172000 |
| H | -4.890643000 | 0.978077000  | 0.270751000  |
| H | -4.064139000 | -3.238527000 | -0.355200000 |
| C | -2.201972000 | 1.733398000  | 0.186991000  |
| C | -0.873296000 | 2.019966000  | 0.129309000  |
| C | 0.014724000  | 0.838736000  | -0.043831000 |
| C | -0.293955000 | 3.418259000  | 0.232917000  |
| H | 0.348041000  | 3.515814000  | 1.125410000  |
| H | 0.343347000  | 3.640315000  | -0.639291000 |
| N | -0.482049000 | -0.419521000 | -0.166169000 |
| N | 1.342221000  | 1.127930000  | -0.151061000 |
| C | 2.371495000  | 0.222438000  | -0.049710000 |
| C | 3.643996000  | 0.682294000  | -0.535403000 |
| C | 2.314779000  | -1.083125000 | 0.552092000  |
| C | 4.780700000  | -0.126571000 | -0.466115000 |
| H | 3.685208000  | 1.683679000  | -0.972122000 |
| C | 3.467964000  | -1.870155000 | 0.636874000  |
| H | 1.366487000  | -1.444462000 | 0.946802000  |
| C | 4.701685000  | -1.409361000 | 0.122478000  |

|   |              |              |              |
|---|--------------|--------------|--------------|
| H | 5.735241000  | 0.238658000  | -0.857505000 |
| H | 3.412248000  | -2.856372000 | 1.109034000  |
| H | 5.594145000  | -2.038825000 | 0.191172000  |
| H | -1.101919000 | 4.163713000  | 0.294793000  |
| H | -5.697920000 | -1.372696000 | 0.008980000  |

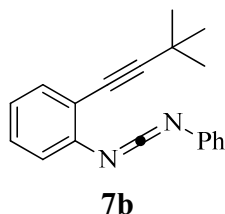

|                                              |                             |
|----------------------------------------------|-----------------------------|
| Zero-point correction=                       | 0.308490 (Hartree/Particle) |
| Thermal correction to Energy=                | 0.328941                    |
| Thermal correction to Enthalpy=              | 0.329885                    |
| Thermal correction to Gibbs Free Energy=     | 0.256198                    |
| Sum of electronic and zero-point Energies=   | -843.651931                 |
| Sum of electronic and thermal Energies=      | -843.631480                 |
| Sum of electronic and thermal Enthalpies=    | -843.630536                 |
| Sum of electronic and thermal Free Energies= | -843.704224                 |

|   |              |              |              |
|---|--------------|--------------|--------------|
| C | -3.483608000 | -2.342958000 | -0.200364000 |
| C | -2.417828000 | -1.415557000 | -0.251861000 |
| C | -2.650240000 | -0.044214000 | 0.101727000  |
| C | -3.962491000 | 0.330349000  | 0.502500000  |
| C | -5.009076000 | -0.601569000 | 0.551005000  |
| C | -4.768462000 | -1.944570000 | 0.196474000  |
| H | -3.276535000 | -3.379464000 | -0.478831000 |
| H | -4.140280000 | 1.374653000  | 0.773046000  |
| H | -5.578461000 | -2.679182000 | 0.228973000  |
| C | -1.614108000 | 0.940258000  | 0.055136000  |
| C | -0.781978000 | 1.843270000  | 0.028022000  |
| C | -0.021934000 | -1.481460000 | -0.784310000 |
| C | 0.216270000  | 2.933808000  | -0.023914000 |
| N | -1.172171000 | -1.916491000 | -0.659888000 |
| N | 1.143054000  | -1.245800000 | -1.135450000 |
| C | 2.359149000  | -1.266631000 | -0.416562000 |
| C | 3.546851000  | -0.973021000 | -1.125634000 |
| C | 2.429292000  | -1.577593000 | 0.964468000  |
| C | 4.786161000  | -0.992686000 | -0.462975000 |
| H | 3.480294000  | -0.739326000 | -2.191557000 |
| C | 3.673316000  | -1.594307000 | 1.616834000  |
| H | 1.510894000  | -1.803390000 | 1.514779000  |
| C | 4.857113000  | -1.302379000 | 0.909395000  |
| H | 5.699202000  | -0.766357000 | -1.022383000 |
| H | 3.716861000  | -1.836703000 | 2.683454000  |

|   |              |              |              |
|---|--------------|--------------|--------------|
| H | 5.823063000  | -1.317176000 | 1.422743000  |
| C | -0.508691000 | 4.301017000  | 0.190755000  |
| H | -1.011414000 | 4.332667000  | 1.171983000  |
| H | 0.226365000  | 5.124228000  | 0.150405000  |
| H | -1.266751000 | 4.473842000  | -0.591400000 |
| C | 1.280650000  | 2.726489000  | 1.101375000  |
| H | 2.022407000  | 3.544107000  | 1.067587000  |
| H | 0.806729000  | 2.728765000  | 2.097327000  |
| H | 1.812301000  | 1.770026000  | 0.973052000  |
| C | 0.919496000  | 2.927930000  | -1.419206000 |
| H | 1.427775000  | 1.967561000  | -1.601112000 |
| H | 0.188535000  | 3.090138000  | -2.228916000 |
| H | 1.671314000  | 3.735941000  | -1.461138000 |
| H | -6.007767000 | -0.281351000 | 0.862173000  |

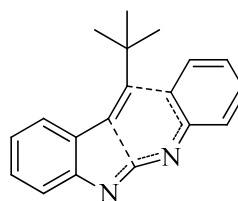

|                                              |                             |
|----------------------------------------------|-----------------------------|
| Zero-point correction=                       | 0.308920 (Hartree/Particle) |
| Thermal correction to Energy=                | 0.327046                    |
| Thermal correction to Enthalpy=              | 0.327990                    |
| Thermal correction to Gibbs Free Energy=     | 0.263736                    |
| Sum of electronic and zero-point Energies=   | -843.603096                 |
| Sum of electronic and thermal Energies=      | -843.584969                 |
| Sum of electronic and thermal Enthalpies=    | -843.584025                 |
| Sum of electronic and thermal Free Energies= | -843.648280                 |

|   |              |              |              |
|---|--------------|--------------|--------------|
| C | -4.067980000 | -1.565079000 | 0.284318000  |
| C | -2.687798000 | -1.302841000 | 0.187729000  |
| C | -2.215074000 | 0.020499000  | -0.101142000 |
| C | -3.131218000 | 1.058681000  | -0.332166000 |
| C | -4.514943000 | 0.787761000  | -0.239553000 |
| C | -4.974913000 | -0.509976000 | 0.068955000  |
| H | -4.410998000 | -2.581276000 | 0.495779000  |
| H | -2.801280000 | 2.067723000  | -0.578638000 |
| H | -6.050632000 | -0.701158000 | 0.134957000  |
| C | -0.726135000 | -0.036946000 | -0.058776000 |
| C | 0.260806000  | 0.818601000  | -0.048170000 |
| C | -0.515561000 | -1.672235000 | 0.069475000  |
| C | 0.786094000  | 2.217844000  | -0.081353000 |
| N | -1.673801000 | -2.251042000 | 0.330879000  |
| N | 0.629221000  | -2.240672000 | -0.267852000 |

|   |              |              |              |
|---|--------------|--------------|--------------|
| C | 1.824327000  | -1.636947000 | -0.083892000 |
| C | 2.924033000  | -2.021370000 | -0.930636000 |
| C | 2.051564000  | -0.627743000 | 0.925532000  |
| C | 4.183533000  | -1.469068000 | -0.749731000 |
| H | 2.730445000  | -2.770924000 | -1.702455000 |
| C | 3.370883000  | -0.115921000 | 1.115316000  |
| H | 1.329264000  | -0.521771000 | 1.736272000  |
| C | 4.418017000  | -0.517283000 | 0.290242000  |
| H | 5.012220000  | -1.777462000 | -1.394902000 |
| H | 3.567084000  | 0.567469000  | 1.947143000  |
| H | 5.427684000  | -0.127674000 | 0.451944000  |
| C | -0.350579000 | 3.161034000  | -0.618324000 |
| H | -0.735916000 | 2.818746000  | -1.591833000 |
| H | -1.183128000 | 3.232585000  | 0.097128000  |
| H | 0.072659000  | 4.172045000  | -0.751982000 |
| C | 1.177278000  | 2.712284000  | 1.346852000  |
| H | 1.483307000  | 3.771551000  | 1.294125000  |
| H | 0.323390000  | 2.633170000  | 2.040098000  |
| H | 2.017623000  | 2.138654000  | 1.761126000  |
| C | 1.999320000  | 2.333607000  | -1.057176000 |
| H | 2.830040000  | 1.686061000  | -0.745066000 |
| H | 1.703524000  | 2.048298000  | -2.080427000 |
| H | 2.358093000  | 3.377608000  | -1.079370000 |
| H | -5.231239000 | 1.598929000  | -0.400103000 |

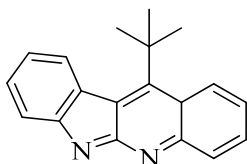

**9b<sub>DA</sub>**

|                                              |                             |
|----------------------------------------------|-----------------------------|
| Zero-point correction=                       | 0.312399 (Hartree/Particle) |
| Thermal correction to Energy=                | 0.329937                    |
| Thermal correction to Enthalpy=              | 0.330882                    |
| Thermal correction to Gibbs Free Energy=     | 0.268762                    |
| Sum of electronic and zero-point Energies=   | -843.645102                 |
| Sum of electronic and thermal Energies=      | -843.627563                 |
| Sum of electronic and thermal Enthalpies=    | -843.626619                 |
| Sum of electronic and thermal Free Energies= | -843.688739                 |

|   |              |              |              |
|---|--------------|--------------|--------------|
| C | -3.838211000 | -1.752690000 | -0.025233000 |
| C | -2.474912000 | -1.431703000 | 0.098708000  |
| C | -1.988205000 | -0.093165000 | -0.111647000 |
| C | -2.907080000 | 0.903763000  | -0.498672000 |
| C | -4.274009000 | 0.578442000  | -0.629918000 |
| C | -4.737735000 | -0.733240000 | -0.386979000 |

|   |              |              |              |
|---|--------------|--------------|--------------|
| H | -4.170671000 | -2.780273000 | 0.144945000  |
| H | -2.594181000 | 1.927450000  | -0.709423000 |
| H | -5.803265000 | -0.959538000 | -0.492866000 |
| C | -0.519966000 | -0.191673000 | 0.067132000  |
| C | 0.556989000  | 0.662404000  | 0.155520000  |
| C | -0.323284000 | -1.667640000 | 0.329297000  |
| C | 0.477534000  | 2.213642000  | 0.309233000  |
| N | -1.454958000 | -2.351540000 | 0.401142000  |
| N | 0.897269000  | -2.280196000 | 0.525178000  |
| C | 1.959706000  | -1.528371000 | 0.356681000  |
| C | 3.272788000  | -2.162352000 | 0.304647000  |
| C | 1.940117000  | -0.001473000 | 0.197099000  |
| C | 4.299360000  | -1.558206000 | -0.377113000 |
| H | 3.354231000  | -3.182473000 | 0.690296000  |
| C | 2.940531000  | 0.422409000  | -0.889412000 |
| H | 2.419615000  | 0.348180000  | 1.145037000  |
| C | 4.080268000  | -0.296487000 | -1.079328000 |
| H | 5.260488000  | -2.069140000 | -0.490663000 |
| H | 2.751491000  | 1.330865000  | -1.463138000 |
| H | 4.829242000  | 0.042063000  | -1.802578000 |
| C | 1.801902000  | 2.857155000  | 0.835626000  |
| H | 2.660698000  | 2.733433000  | 0.160187000  |
| H | 1.638127000  | 3.941260000  | 0.957950000  |
| H | 2.084846000  | 2.459226000  | 1.825867000  |
| C | -0.601661000 | 2.589317000  | 1.377848000  |
| H | -1.600660000 | 2.200982000  | 1.151821000  |
| H | -0.310358000 | 2.196787000  | 2.367391000  |
| H | -0.673042000 | 3.688269000  | 1.458469000  |
| C | 0.143196000  | 2.867228000  | -1.072634000 |
| H | -0.015222000 | 3.953172000  | -0.946852000 |
| H | 0.970317000  | 2.730670000  | -1.789951000 |
| H | -0.760119000 | 2.438184000  | -1.530118000 |
| H | -4.981688000 | 1.358867000  | -0.925741000 |

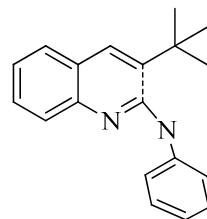

**7b<sub>TSMS</sub>**

|                                            |                             |
|--------------------------------------------|-----------------------------|
| Zero-point correction=                     | 0.307547 (Hartree/Particle) |
| Thermal correction to Energy=              | 0.326388                    |
| Thermal correction to Enthalpy=            | 0.327332                    |
| Thermal correction to Gibbs Free Energy=   | 0.260139                    |
| Sum of electronic and zero-point Energies= | -843.607282                 |
| Sum of electronic and thermal Energies=    | -843.588441                 |



Sum of electronic and thermal Enthalpies= -843.587497  
 Sum of electronic and thermal Free Energies= -843.654690

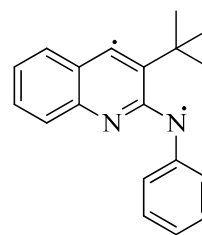

### 7b\_INT<sub>MS</sub> (Singlet)

Zero-point correction= 0.308871 (Hartree/Particle)  
 Thermal correction to Energy= 0.327570  
 Thermal correction to Enthalpy= 0.328515  
 Thermal correction to Gibbs Free Energy= 0.262005  
 Sum of electronic and zero-point Energies= -843.615291  
 Sum of electronic and thermal Energies= -843.596592  
 Sum of electronic and thermal Enthalpies= -843.595648  
 Sum of electronic and thermal Free Energies= -843.662157

|   |              |              |              |
|---|--------------|--------------|--------------|
| C | -2.706809000 | -2.538208000 | -0.256980000 |
| C | -2.031584000 | -1.286014000 | -0.224583000 |
| C | -2.829639000 | -0.090742000 | 0.046735000  |
| C | -4.235707000 | -0.196913000 | 0.196171000  |
| C | -4.860256000 | -1.447215000 | 0.153543000  |
| C | -4.088371000 | -2.616066000 | -0.059837000 |
| H | -2.109580000 | -3.435117000 | -0.439861000 |
| H | -4.814977000 | 0.713132000  | 0.373124000  |
| H | -4.578700000 | -3.594060000 | -0.081849000 |
| C | -2.038732000 | 1.066290000  | 0.087433000  |
| C | -0.809836000 | 1.434721000  | -0.048632000 |
| C | 0.040689000  | -0.139472000 | -0.517334000 |
| C | -0.011653000 | 2.718039000  | 0.168401000  |
| N | -0.701405000 | -1.217707000 | -0.527368000 |
| N | 1.272076000  | 0.106529000  | -0.815213000 |
| C | 2.384815000  | -0.578074000 | -0.324299000 |
| C | 3.648867000  | -0.277469000 | -0.906621000 |
| C | 2.320416000  | -1.558555000 | 0.708071000  |
| C | 4.801752000  | -0.960446000 | -0.494955000 |
| H | 3.692529000  | 0.481414000  | -1.692624000 |
| C | 3.483038000  | -2.230133000 | 1.114707000  |
| H | 1.359444000  | -1.784950000 | 1.176007000  |
| C | 4.727962000  | -1.939588000 | 0.518307000  |
| H | 5.763706000  | -0.727465000 | -0.962407000 |
| H | 3.419159000  | -2.983658000 | 1.906454000  |
| H | 5.630633000  | -2.464925000 | 0.844199000  |
| C | -1.018586000 | 3.808925000  | 0.655803000  |
| H | -0.482142000 | 4.760927000  | 0.814151000  |
| H | -1.812578000 | 3.977506000  | -0.090229000 |
| H | -1.492832000 | 3.514742000  | 1.607036000  |
| C | 1.077391000  | 2.529477000  | 1.266277000  |
| H | 0.626596000  | 2.195765000  | 2.216694000  |
| H | 1.842464000  | 1.800970000  | 0.965719000  |
| H | 1.579740000  | 3.496199000  | 1.446644000  |
| C | 0.636103000  | 3.196897000  | -1.165790000 |
| H | -0.137755000 | 3.393206000  | -1.927618000 |
| H | 1.188416000  | 4.136344000  | -0.986164000 |
| H | 1.334526000  | 2.446203000  | -1.561236000 |
| H | -5.942519000 | -1.520715000 | 0.291537000  |

|   |              |              |              |
|---|--------------|--------------|--------------|
| C | -2.074906000 | -2.782576000 | -0.250453000 |
| C | -1.669947000 | -1.409284000 | -0.169760000 |
| C | -2.709387000 | -0.393932000 | 0.017076000  |
| C | -4.076269000 | -0.788344000 | 0.078315000  |
| C | -4.423823000 | -2.135859000 | -0.003029000 |
| C | -3.417123000 | -3.133889000 | -0.160799000 |
| H | -1.292364000 | -3.535369000 | -0.380361000 |
| H | -4.842145000 | -0.017150000 | 0.200627000  |
| H | -3.707836000 | -4.187292000 | -0.219276000 |
| C | -2.200596000 | 0.913956000  | 0.086506000  |
| C | -0.910524000 | 1.328351000  | -0.019238000 |
| C | 0.051184000  | 0.203818000  | -0.259522000 |
| C | -0.491217000 | 2.812937000  | 0.143251000  |
| N | -0.356951000 | -1.090541000 | -0.305397000 |
| N | 1.353584000  | 0.528353000  | -0.494590000 |
| C | 2.410845000  | -0.292676000 | -0.189434000 |
| C | 3.654687000  | 0.008526000  | -0.842442000 |
| C | 2.393035000  | -1.370211000 | 0.762375000  |
| C | 4.796796000  | -0.758933000 | -0.603220000 |
| H | 3.669110000  | 0.843032000  | -1.548576000 |
| C | 3.552232000  | -2.113189000 | 1.009110000  |
| H | 1.471926000  | -1.589397000 | 1.302230000  |
| C | 4.754929000  | -1.825080000 | 0.325109000  |
| H | 5.728971000  | -0.526798000 | -1.127509000 |
| H | 3.526501000  | -2.923848000 | 1.744368000  |
| H | 5.654604000  | -2.414819000 | 0.525174000  |
| C | -1.738356000 | 3.660734000  | 0.529587000  |
| H | -2.173683000 | 3.326270000  | 1.487109000  |
| H | -1.449242000 | 4.721016000  | 0.637780000  |

|   |              |              |              |
|---|--------------|--------------|--------------|
| H | -2.524129000 | 3.598468000  | -0.242660000 |
| C | 0.572092000  | 2.971121000  | 1.271757000  |
| H | 0.186281000  | 2.593259000  | 2.235246000  |
| H | 1.500979000  | 2.433469000  | 1.030835000  |
| H | 0.817485000  | 4.040586000  | 1.401103000  |
| C | 0.075914000  | 3.355557000  | -1.206191000 |
| H | 0.966012000  | 2.792467000  | -1.520777000 |
| H | -0.683723000 | 3.287868000  | -2.004585000 |
| H | 0.352919000  | 4.419079000  | -1.089471000 |
| H | -5.475503000 | -2.431686000 | 0.054667000  |

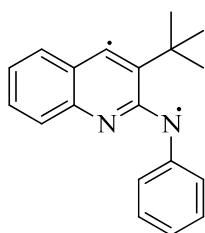

### 7b\_INTMS (Triplet)

|                                              |                             |
|----------------------------------------------|-----------------------------|
| Zero-point correction=                       | 0.309143 (Hartree/Particle) |
| Thermal correction to Energy=                | 0.327796                    |
| Thermal correction to Enthalpy=              | 0.328741                    |
| Thermal correction to Gibbs Free Energy=     | 0.261247                    |
| Sum of electronic and zero-point Energies=   | -843.613440                 |
| Sum of electronic and thermal Energies=      | -843.594787                 |
| Sum of electronic and thermal Enthalpies=    | -843.593842                 |
| Sum of electronic and thermal Free Energies= | -843.661335                 |

|   |              |              |              |
|---|--------------|--------------|--------------|
| C | -1.998113000 | -2.816765000 | -0.299577000 |
| C | -1.631794000 | -1.435467000 | -0.170231000 |
| C | -2.698684000 | -0.453073000 | 0.031918000  |
| C | -4.050773000 | -0.890600000 | 0.115017000  |
| C | -4.360495000 | -2.244846000 | -0.005809000 |
| C | -3.329270000 | -3.208170000 | -0.215910000 |
| H | -1.196112000 | -3.541768000 | -0.464244000 |
| H | -4.837357000 | -0.146496000 | 0.269806000  |
| H | -3.592592000 | -4.265812000 | -0.313808000 |
| C | -2.233744000 | 0.872208000  | 0.120178000  |
| C | -0.948848000 | 1.316823000  | 0.032271000  |
| C | 0.050467000  | 0.219557000  | -0.132518000 |
| C | -0.591666000 | 2.825152000  | 0.104855000  |
| N | -0.321466000 | -1.084530000 | -0.223188000 |
| N | 1.358835000  | 0.583248000  | -0.283436000 |
| C | 2.431088000  | -0.257725000 | -0.104352000 |
| C | 3.664130000  | 0.165311000  | -0.709314000 |
| C | 2.451799000  | -1.452758000 | 0.695939000  |

|   |              |              |              |
|---|--------------|--------------|--------------|
| C | 4.833518000  | -0.585809000 | -0.568255000 |
| H | 3.650676000  | 1.086201000  | -1.298368000 |
| C | 3.637842000  | -2.177442000 | 0.851465000  |
| H | 1.537719000  | -1.776448000 | 1.191956000  |
| C | 4.830006000  | -1.762764000 | 0.214800000  |
| H | 5.756186000  | -0.254709000 | -1.054865000 |
| H | 3.640956000  | -3.076632000 | 1.475991000  |
| H | 5.749356000  | -2.342850000 | 0.339774000  |
| C | -1.887677000 | 3.651228000  | 0.354053000  |
| H | -2.370732000 | 3.369420000  | 1.305600000  |
| H | -1.639779000 | 4.726261000  | 0.402154000  |
| H | -2.622222000 | 3.507365000  | -0.456852000 |
| C | 0.395275000  | 3.102912000  | 1.280375000  |
| H | -0.036205000 | 2.777025000  | 2.243492000  |
| H | 1.353162000  | 2.583418000  | 1.131810000  |
| H | 0.593690000  | 4.187844000  | 1.348300000  |
| C | 0.036100000  | 3.295765000  | -1.244567000 |
| H | 0.966379000  | 2.752979000  | -1.463043000 |
| H | -0.668602000 | 3.138346000  | -2.080054000 |
| H | 0.261376000  | 4.376267000  | -1.189705000 |
| H | -5.402446000 | -2.572655000 | 0.056406000  |

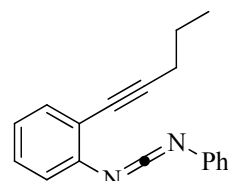

### 7c

|                                              |                             |
|----------------------------------------------|-----------------------------|
| Zero-point correction=                       | 0.281649 (Hartree/Particle) |
| Thermal correction to Energy=                | 0.300739                    |
| Thermal correction to Enthalpy=              | 0.301683                    |
| Thermal correction to Gibbs Free Energy=     | 0.229488                    |
| Sum of electronic and zero-point Energies=   | -804.392317                 |
| Sum of electronic and thermal Energies=      | -804.373227                 |
| Sum of electronic and thermal Enthalpies=    | -804.372283                 |
| Sum of electronic and thermal Free Energies= | -804.444478                 |

|   |              |              |              |
|---|--------------|--------------|--------------|
| C | -3.832797000 | -1.759923000 | -0.385292000 |
| C | -2.622764000 | -1.036951000 | -0.283962000 |
| C | -2.637018000 | 0.305929000  | 0.223613000  |
| C | -3.886291000 | 0.865083000  | 0.608025000  |
| C | -5.079567000 | 0.136614000  | 0.497059000  |
| C | -5.052111000 | -1.181310000 | -0.002480000 |
| H | -3.791249000 | -2.781390000 | -0.772136000 |
| H | -3.896987000 | 1.887473000  | 0.995383000  |
| H | -5.977499000 | -1.757908000 | -0.092171000 |

|   |              |              |              |
|---|--------------|--------------|--------------|
| C | -1.437459000 | 1.072989000  | 0.349545000  |
| C | -0.430222000 | 1.762878000  | 0.478925000  |
| C | -0.259003000 | -1.403372000 | -0.798096000 |
| C | 0.777007000  | 2.592823000  | 0.585043000  |
| H | 0.778382000  | 3.119375000  | 1.559927000  |
| H | 1.670203000  | 1.939163000  | 0.587637000  |
| N | -1.453970000 | -1.703942000 | -0.684024000 |
| N | 0.924155000  | -1.300973000 | -1.150371000 |
| C | 2.133022000  | -1.387308000 | -0.425239000 |
| C | 3.341419000  | -1.221499000 | -1.140849000 |
| C | 2.175679000  | -1.638356000 | 0.969056000  |
| C | 4.574119000  | -1.307273000 | -0.471201000 |
| H | 3.294786000  | -1.031425000 | -2.216455000 |
| C | 3.413410000  | -1.721189000 | 1.628393000  |
| H | 1.241342000  | -1.765141000 | 1.523966000  |
| C | 4.617860000  | -1.556356000 | 0.914696000  |
| H | 5.503269000  | -1.180033000 | -1.035418000 |
| H | 3.435882000  | -1.916372000 | 2.705309000  |
| H | 5.578747000  | -1.622843000 | 1.433463000  |
| C | 0.914031000  | 3.642345000  | -0.561599000 |
| H | 0.019705000  | 4.291121000  | -0.560815000 |
| H | 0.918804000  | 3.111327000  | -1.529953000 |
| C | 2.190441000  | 4.498715000  | -0.419642000 |
| H | 3.099766000  | 3.871598000  | -0.444060000 |
| H | 2.266184000  | 5.231599000  | -1.241467000 |
| H | 2.194828000  | 5.060457000  | 0.532116000  |
| H | -6.025980000 | 0.594362000  | 0.799472000  |

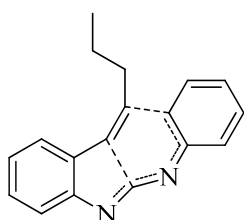

**7c\_TS DA**

|                                              |                             |
|----------------------------------------------|-----------------------------|
| Zero-point correction=                       | 0.281293 (Hartree/Particle) |
| Thermal correction to Energy=                | 0.298453                    |
| Thermal correction to Enthalpy=              | 0.299397                    |
| Thermal correction to Gibbs Free Energy=     | 0.235818                    |
| Sum of electronic and zero-point Energies=   | -804.350731                 |
| Sum of electronic and thermal Energies=      | -804.333572                 |
| Sum of electronic and thermal Enthalpies=    | -804.332628                 |
| Sum of electronic and thermal Free Energies= | -804.396207                 |

|   |              |              |             |
|---|--------------|--------------|-------------|
| C | -4.023066000 | -1.480678000 | 0.128977000 |
| C | -2.630222000 | -1.275273000 | 0.098238000 |

|   |              |              |              |
|---|--------------|--------------|--------------|
| C | -2.106053000 | 0.051895000  | -0.035567000 |
| C | -2.963033000 | 1.156370000  | -0.155549000 |
| C | -4.358354000 | 0.941008000  | -0.126858000 |
| C | -4.876157000 | -0.365119000 | 0.013391000  |
| H | -4.420340000 | -2.494824000 | 0.221819000  |
| H | -2.565941000 | 2.169401000  | -0.262337000 |
| H | -5.960263000 | -0.515330000 | 0.032174000  |
| C | -0.632739000 | -0.034900000 | 0.020105000  |
| C | 0.372818000  | 0.764765000  | 0.120447000  |
| C | -0.462411000 | -1.747253000 | 0.004427000  |
| C | 1.136216000  | 2.015375000  | 0.216503000  |
| H | 1.428320000  | 2.194395000  | 1.269754000  |
| H | 2.083623000  | 1.931305000  | -0.350837000 |
| N | -1.654335000 | -2.270719000 | 0.190342000  |
| N | 0.686011000  | -2.272493000 | -0.338585000 |
| C | 1.882936000  | -1.667901000 | -0.104305000 |
| C | 2.948750000  | -1.854169000 | -1.047998000 |
| C | 2.121366000  | -0.823510000 | 1.036124000  |
| C | 4.173311000  | -1.219785000 | -0.865893000 |
| H | 2.760750000  | -2.499102000 | -1.910427000 |
| C | 3.391160000  | -0.217397000 | 1.219762000  |
| H | 1.400630000  | -0.822124000 | 1.855637000  |
| C | 4.401749000  | -0.390794000 | 0.271078000  |
| H | 4.973505000  | -1.362462000 | -1.598978000 |
| H | 3.579054000  | 0.376005000  | 2.120509000  |
| H | 5.378943000  | 0.080966000  | 0.412324000  |
| C | 0.339454000  | 3.255476000  | -0.313436000 |
| H | 0.010682000  | 3.057465000  | -1.348513000 |
| H | -0.570597000 | 3.388929000  | 0.296205000  |
| C | 1.196804000  | 4.539693000  | -0.267145000 |
| H | 0.620381000  | 5.404010000  | -0.639231000 |
| H | 1.521927000  | 4.770363000  | 0.763022000  |
| H | 2.100737000  | 4.442154000  | -0.894086000 |
| H | -5.038312000 | 1.794519000  | -0.203123000 |

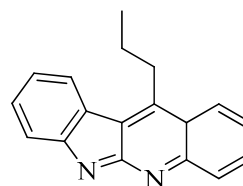

**9c DA**

|                                            |                             |
|--------------------------------------------|-----------------------------|
| Zero-point correction=                     | 0.285255 (Hartree/Particle) |
| Thermal correction to Energy=              | 0.301558                    |
| Thermal correction to Enthalpy=            | 0.302502                    |
| Thermal correction to Gibbs Free Energy=   | 0.241328                    |
| Sum of electronic and zero-point Energies= | -804.405830                 |
| Sum of electronic and thermal Energies=    | -804.389527                 |

Sum of electronic and thermal Enthalpies= -804.388583  
 Sum of electronic and thermal Free Energies= -804.449757

|   |              |              |              |
|---|--------------|--------------|--------------|
| C | -3.837984000 | -1.686070000 | -0.199564000 |
| C | -2.459236000 | -1.430869000 | -0.093758000 |
| C | -1.965471000 | -0.091649000 | 0.096832000  |
| C | -2.869410000 | 0.984073000  | 0.168352000  |
| C | -4.252475000 | 0.720599000  | 0.065265000  |
| C | -4.728710000 | -0.598049000 | -0.116090000 |
| H | -4.195004000 | -2.709023000 | -0.346983000 |
| H | -2.527252000 | 2.014947000  | 0.293413000  |
| H | -5.805901000 | -0.774113000 | -0.197777000 |
| C | -0.506297000 | -0.247157000 | 0.176476000  |
| C | 0.550089000  | 0.585450000  | 0.417349000  |
| C | -0.298497000 | -1.717612000 | -0.024263000 |
| C | 0.414237000  | 2.075575000  | 0.667770000  |
| H | -0.523556000 | 2.270464000  | 1.216957000  |
| H | 1.232234000  | 2.426448000  | 1.324432000  |
| N | -1.432538000 | -2.395436000 | -0.164632000 |
| N | 0.940060000  | -2.315433000 | -0.103712000 |
| C | 1.994461000  | -1.540062000 | 0.071804000  |
| C | 3.311712000  | -2.108095000 | -0.150043000 |
| C | 1.927824000  | -0.073071000 | 0.548146000  |
| C | 4.424331000  | -1.310470000 | -0.264078000 |
| H | 3.357626000  | -3.187562000 | -0.318702000 |
| C | 3.149597000  | 0.744913000  | 0.155135000  |
| H | 2.047047000  | -0.174154000 | 1.662341000  |
| C | 4.325440000  | 0.139614000  | -0.168050000 |
| H | 5.397178000  | -1.759022000 | -0.487676000 |
| H | 3.091929000  | 1.833604000  | 0.227465000  |
| H | 5.213251000  | 0.744323000  | -0.378734000 |
| C | 0.414461000  | 2.928546000  | -0.640666000 |
| H | 1.334628000  | 2.721948000  | -1.216775000 |
| H | -0.426230000 | 2.601307000  | -1.277574000 |
| C | 0.304126000  | 4.442869000  | -0.358091000 |
| H | 0.293697000  | 5.019448000  | -1.299149000 |
| H | -0.623143000 | 4.682444000  | 0.192766000  |
| H | 1.155146000  | 4.803406000  | 0.247650000  |
| H | -4.963502000 | 1.550425000  | 0.121613000  |

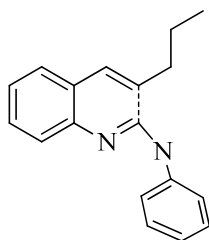

## 7c\_TSms

Zero-point correction= 0.280594 (Hartree/Particle)  
 Thermal correction to Energy= 0.298108  
 Thermal correction to Enthalpy= 0.299052  
 Thermal correction to Gibbs Free Energy= 0.233081  
 Sum of electronic and zero-point Energies= -804.354363  
 Sum of electronic and thermal Energies= -804.336849  
 Sum of electronic and thermal Enthalpies= -804.335905  
 Sum of electronic and thermal Free Energies= -804.401876

|   |              |              |              |
|---|--------------|--------------|--------------|
| C | -3.461027000 | -1.965481000 | -0.368503000 |
| C | -2.424114000 | -0.992622000 | -0.312196000 |
| C | -2.762258000 | 0.333223000  | 0.195804000  |
| C | -4.087999000 | 0.616347000  | 0.614495000  |
| C | -5.077644000 | -0.367608000 | 0.540347000  |
| C | -4.759098000 | -1.657838000 | 0.047667000  |
| H | -3.206760000 | -2.958735000 | -0.747221000 |
| H | -4.317829000 | 1.616701000  | 0.991023000  |
| H | -5.537411000 | -2.424937000 | -0.008636000 |
| C | -1.651816000 | 1.194713000  | 0.199314000  |
| C | -0.400643000 | 1.113311000  | -0.149217000 |
| C | -0.133329000 | -0.514120000 | -0.691431000 |
| C | 0.769297000  | 2.055240000  | -0.229641000 |
| H | 1.591872000  | 1.679453000  | 0.406312000  |
| H | 1.162353000  | 2.028429000  | -1.263539000 |
| N | -1.158047000 | -1.331207000 | -0.714137000 |
| N | 1.088389000  | -0.651053000 | -1.139885000 |
| C | 2.225889000  | -0.949621000 | -0.419807000 |
| C | 3.478403000  | -0.916210000 | -1.105406000 |
| C | 2.212318000  | -1.339488000 | 0.956869000  |
| C | 4.660993000  | -1.273027000 | -0.445538000 |
| H | 3.483327000  | -0.619909000 | -2.157921000 |
| C | 3.404472000  | -1.686851000 | 1.605120000  |
| H | 1.259811000  | -1.368277000 | 1.493947000  |
| C | 4.634907000  | -1.657616000 | 0.912587000  |
| H | 5.610973000  | -1.250105000 | -0.988677000 |
| H | 3.377902000  | -1.985134000 | 2.658206000  |
| H | 5.561528000  | -1.930286000 | 1.426131000  |
| C | 0.420727000  | 3.509804000  | 0.177541000  |
| H | -0.406896000 | 3.873837000  | -0.457958000 |
| H | 0.044556000  | 3.516726000  | 1.216353000  |
| C | 1.636245000  | 4.454054000  | 0.052680000  |
| H | 1.367373000  | 5.483172000  | 0.347986000  |
| H | 2.469538000  | 4.126622000  | 0.700360000  |
| H | 2.012818000  | 4.490985000  | -0.985495000 |
| H | -6.097486000 | -0.139981000 | 0.863183000  |

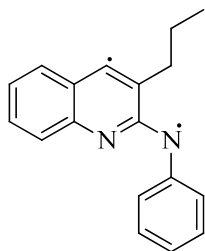

### 7c\_INT<sub>MS</sub> (Singlet)

|                                              |                             |
|----------------------------------------------|-----------------------------|
| Zero-point correction=                       | 0.282133 (Hartree/Particle) |
| Thermal correction to Energy=                | 0.299510                    |
| Thermal correction to Enthalpy=              | 0.300455                    |
| Thermal correction to Gibbs Free Energy=     | 0.235288                    |
| Sum of electronic and zero-point Energies=   | -804.359276                 |
| Sum of electronic and thermal Energies=      | -804.341899                 |
| Sum of electronic and thermal Enthalpies=    | -804.340954                 |
| Sum of electronic and thermal Free Energies= | -804.406121                 |

|   |              |              |              |
|---|--------------|--------------|--------------|
| C | -1.586888000 | -2.883571000 | -0.402217000 |
| C | -1.352389000 | -1.487336000 | -0.173432000 |
| C | -2.504159000 | -0.639826000 | 0.159151000  |
| C | -3.805150000 | -1.216600000 | 0.217692000  |
| C | -3.983917000 | -2.580295000 | -0.008349000 |
| C | -2.868366000 | -3.414883000 | -0.313569000 |
| H | -0.722528000 | -3.509007000 | -0.642204000 |
| H | -4.656021000 | -0.570597000 | 0.452017000  |
| H | -3.026372000 | -4.483908000 | -0.486074000 |
| C | -2.172107000 | 0.711987000  | 0.358745000  |
| C | -0.944259000 | 1.283024000  | 0.257196000  |
| C | 0.143750000  | 0.328133000  | -0.115410000 |
| C | -0.608901000 | 2.738211000  | 0.564640000  |
| H | -0.075358000 | 2.766874000  | 1.535330000  |
| H | 0.131510000  | 3.084387000  | -0.178368000 |
| N | -0.093273000 | -0.993820000 | -0.304219000 |
| N | 1.373864000  | 0.878724000  | -0.307358000 |
| C | 2.555477000  | 0.208749000  | -0.116246000 |
| C | 3.723520000  | 0.810554000  | -0.698503000 |
| C | 2.729052000  | -0.992952000 | 0.654857000  |
| C | 4.980378000  | 0.216723000  | -0.565721000 |
| H | 3.587914000  | 1.736204000  | -1.264185000 |
| C | 3.998773000  | -1.561872000 | 0.797499000  |
| H | 1.863400000  | -1.445525000 | 1.138231000  |
| C | 5.128164000  | -0.973481000 | 0.184146000  |
| H | 5.854449000  | 0.679940000  | -1.033865000 |
| H | 4.117898000  | -2.471164000 | 1.395367000  |
| H | 6.115943000  | -1.429150000 | 0.302106000  |

|   |              |              |              |
|---|--------------|--------------|--------------|
| C | -1.818465000 | 3.705990000  | 0.617088000  |
| H | -2.573339000 | 3.317249000  | 1.325715000  |
| H | -1.461026000 | 4.664930000  | 1.036530000  |
| C | -2.479016000 | 3.972084000  | -0.754748000 |
| H | -2.881974000 | 3.045461000  | -1.197721000 |
| H | -3.314037000 | 4.688303000  | -0.657784000 |
| H | -1.751214000 | 4.398726000  | -1.468782000 |
| H | -4.986356000 | -3.014879000 | 0.047804000  |

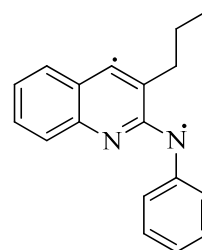

### 7c\_INT<sub>MS</sub> (Triplet)

|                                              |                             |
|----------------------------------------------|-----------------------------|
| Zero-point correction=                       | 0.282345 (Hartree/Particle) |
| Thermal correction to Energy=                | 0.299701                    |
| Thermal correction to Enthalpy=              | 0.300645                    |
| Thermal correction to Gibbs Free Energy=     | 0.234140                    |
| Sum of electronic and zero-point Energies=   | -804.357772                 |
| Sum of electronic and thermal Energies=      | -804.340416                 |
| Sum of electronic and thermal Enthalpies=    | -804.339471                 |
| Sum of electronic and thermal Free Energies= | -804.405977                 |

|   |              |              |              |
|---|--------------|--------------|--------------|
| C | 1.563912000  | -2.875306000 | 0.409705000  |
| C | 1.345549000  | -1.481381000 | 0.147072000  |
| C | 2.511355000  | -0.646806000 | -0.169033000 |
| C | 3.804043000  | -1.241616000 | -0.223770000 |
| C | 3.966556000  | -2.602688000 | 0.030240000  |
| C | 2.841210000  | -3.419447000 | 0.349828000  |
| H | 0.691561000  | -3.486829000 | 0.656507000  |
| H | 4.663677000  | -0.609488000 | -0.464037000 |
| H | 2.988704000  | -4.484919000 | 0.551066000  |
| C | 2.200874000  | 0.708223000  | -0.389959000 |
| C | 0.969351000  | 1.283819000  | -0.326893000 |
| C | -0.141275000 | 0.333432000  | -0.035910000 |
| C | 0.677079000  | 2.761161000  | -0.567155000 |
| H | 0.187951000  | 2.853627000  | -1.556870000 |
| H | -0.088887000 | 3.085948000  | 0.158641000  |
| N | 0.081274000  | -0.987670000 | 0.185359000  |
| N | -1.378377000 | 0.896324000  | 0.077239000  |
| C | -2.569161000 | 0.212317000  | 0.031814000  |
| C | -3.710306000 | 0.921192000  | 0.542988000  |
| C | -2.788545000 | -1.088113000 | -0.542843000 |

|   |              |              |              |
|---|--------------|--------------|--------------|
| C | -4.984509000 | 0.349087000  | 0.525222000  |
| H | -3.541124000 | 1.918218000  | 0.958377000  |
| C | -4.075180000 | -1.635405000 | -0.577266000 |
| H | -1.943287000 | -1.634090000 | -0.959457000 |
| C | -5.177235000 | -0.933655000 | -0.036867000 |
| H | -5.835936000 | 0.900355000  | 0.936228000  |
| H | -4.228890000 | -2.620339000 | -1.029930000 |
| H | -6.177348000 | -1.376757000 | -0.065641000 |
| C | 1.908085000  | 3.701043000  | -0.514044000 |
| H | 2.686021000  | 3.331748000  | -1.208137000 |
| H | 1.591579000  | 4.689364000  | -0.896459000 |
| C | 2.511488000  | 3.877751000  | 0.898001000  |
| H | 2.873998000  | 2.919317000  | 1.307389000  |
| H | 3.365682000  | 4.577464000  | 0.877365000  |
| H | 1.761662000  | 4.283049000  | 1.601672000  |
| H | 4.964619000  | -3.048888000 | -0.011665000 |

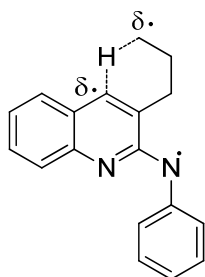

### 7c\_TS<sub>7HT</sub>

|                                              |                             |
|----------------------------------------------|-----------------------------|
| Zero-point correction=                       | 0.277372 (Hartree/Particle) |
| Thermal correction to Energy=                | 0.293730                    |
| Thermal correction to Enthalpy=              | 0.294674                    |
| Thermal correction to Gibbs Free Energy=     | 0.232818                    |
| Sum of electronic and zero-point Energies=   | -804.347140                 |
| Sum of electronic and thermal Energies=      | -804.330783                 |
| Sum of electronic and thermal Enthalpies=    | -804.329838                 |
| Sum of electronic and thermal Free Energies= | -804.391694                 |

|   |              |              |              |
|---|--------------|--------------|--------------|
| C | -1.555754000 | -2.837653000 | -0.160320000 |
| C | -1.303228000 | -1.423066000 | -0.140722000 |
| C | -2.476203000 | -0.535900000 | -0.041348000 |
| C | -3.788208000 | -1.089035000 | -0.047203000 |
| C | -3.978073000 | -2.467793000 | -0.071647000 |
| C | -2.850130000 | -3.340415000 | -0.115814000 |
| H | -0.687823000 | -3.501328000 | -0.199422000 |
| H | -4.645466000 | -0.409142000 | -0.004577000 |
| H | -3.008363000 | -4.423500000 | -0.121668000 |
| C | -2.133031000 | 0.829252000  | -0.021243000 |
| C | -0.878655000 | 1.345946000  | -0.073214000 |

|   |              |              |              |
|---|--------------|--------------|--------------|
| C | 0.241833000  | 0.365781000  | -0.296259000 |
| C | -0.617497000 | 2.811351000  | 0.216679000  |
| H | -0.310457000 | 2.929805000  | 1.275157000  |
| H | 0.234633000  | 3.161998000  | -0.387411000 |
| N | -0.040034000 | -0.969497000 | -0.303238000 |
| N | 1.455729000  | 0.897801000  | -0.462549000 |
| C | 2.642416000  | 0.255951000  | -0.160576000 |
| C | 3.831649000  | 0.834091000  | -0.711930000 |
| C | 2.787486000  | -0.892932000 | 0.684530000  |
| C | 5.087945000  | 0.266081000  | -0.476633000 |
| H | 3.721088000  | 1.723076000  | -1.339269000 |
| C | 4.055052000  | -1.439630000 | 0.927708000  |
| H | 1.901883000  | -1.333423000 | 1.143006000  |
| C | 5.211106000  | -0.875615000 | 0.346924000  |
| H | 5.979628000  | 0.715398000  | -0.925845000 |
| H | 4.145898000  | -2.314529000 | 1.580220000  |
| H | 6.195655000  | -1.311110000 | 0.543257000  |
| C | -3.128873000 | 3.107376000  | 0.618714000  |
| H | -3.118856000 | 3.072351000  | 1.717969000  |
| H | -4.106790000 | 3.380205000  | 0.198470000  |
| H | -2.985942000 | 1.793283000  | 0.254465000  |
| C | -1.892832000 | 3.665305000  | -0.057100000 |
| H | -2.065173000 | 3.730789000  | -1.146296000 |
| H | -1.700141000 | 4.696651000  | 0.301447000  |
| H | -4.989647000 | -2.883221000 | -0.052263000 |

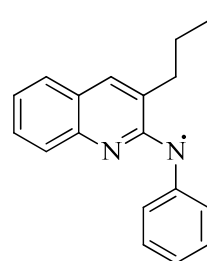

### 7c\_INT<sub>7HT</sub> (Singlet)

|                                              |                             |
|----------------------------------------------|-----------------------------|
| Zero-point correction=                       | 0.280403 (Hartree/Particle) |
| Thermal correction to Energy=                | 0.297922                    |
| Thermal correction to Enthalpy=              | 0.298866                    |
| Thermal correction to Gibbs Free Energy=     | 0.233838                    |
| Sum of electronic and zero-point Energies=   | -804.372003                 |
| Sum of electronic and thermal Energies=      | -804.354485                 |
| Sum of electronic and thermal Enthalpies=    | -804.353541                 |
| Sum of electronic and thermal Free Energies= | -804.418568                 |

|   |              |              |              |
|---|--------------|--------------|--------------|
| C | -1.520493000 | -2.907590000 | -0.197564000 |
| C | -1.321921000 | -1.486814000 | -0.166921000 |
| C | -2.479544000 | -0.621723000 | -0.064722000 |

|   |              |              |              |
|---|--------------|--------------|--------------|
| C | -3.777550000 | -1.202418000 | 0.014778000  |
| C | -3.938161000 | -2.587340000 | -0.007378000 |
| C | -2.800632000 | -3.442691000 | -0.114831000 |
| H | -0.636035000 | -3.544803000 | -0.283998000 |
| H | -4.649980000 | -0.544137000 | 0.091881000  |
| H | -2.942167000 | -4.527756000 | -0.134907000 |
| C | -2.244255000 | 0.790039000  | -0.064354000 |
| C | -0.963551000 | 1.305755000  | -0.159334000 |
| C | 0.147216000  | 0.344263000  | -0.231738000 |
| C | -0.651587000 | 2.796995000  | -0.184682000 |
| H | -0.020499000 | 3.047799000  | 0.689558000  |
| H | -0.001114000 | 2.990963000  | -1.056126000 |
| N | -0.049644000 | -1.000998000 | -0.235432000 |
| N | 1.396804000  | 0.884570000  | -0.377631000 |
| C | 2.571553000  | 0.221928000  | -0.119491000 |
| C | 3.752386000  | 0.798398000  | -0.702539000 |
| C | 2.737713000  | -0.925259000 | 0.733179000  |
| C | 5.013142000  | 0.235557000  | -0.490728000 |
| H | 3.624372000  | 1.683951000  | -1.330941000 |
| C | 4.010652000  | -1.460195000 | 0.957395000  |
| H | 1.862381000  | -1.362338000 | 1.211680000  |
| C | 5.152687000  | -0.898078000 | 0.342650000  |
| H | 5.895405000  | 0.680995000  | -0.961021000 |
| H | 4.121629000  | -2.325357000 | 1.619189000  |
| H | 6.141859000  | -1.330085000 | 0.522609000  |
| C | -2.646437000 | 3.849730000  | 1.058380000  |
| H | -2.174905000 | 3.628550000  | 2.020711000  |
| H | -3.654854000 | 4.273408000  | 1.074086000  |
| H | -3.105026000 | 1.460747000  | 0.017019000  |
| C | -1.865974000 | 3.760744000  | -0.218764000 |
| H | -2.536433000 | 3.508426000  | -1.065485000 |
| H | -1.466129000 | 4.769815000  | -0.476815000 |
| H | -4.940069000 | -3.022991000 | 0.053985000  |

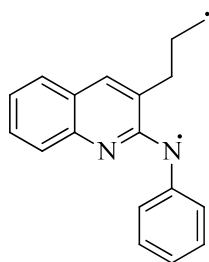

### 7c\_INT<sub>7HT</sub> (Triplet)

|                                            |                             |
|--------------------------------------------|-----------------------------|
| Zero-point correction=                     | 0.280387 (Hartree/Particle) |
| Thermal correction to Energy=              | 0.297938                    |
| Thermal correction to Enthalpy=            | 0.298883                    |
| Thermal correction to Gibbs Free Energy=   | 0.232743                    |
| Sum of electronic and zero-point Energies= | -804.371662                 |

|                                              |             |
|----------------------------------------------|-------------|
| Sum of electronic and thermal Energies=      | -804.354111 |
| Sum of electronic and thermal Enthalpies=    | -804.353167 |
| Sum of electronic and thermal Free Energies= | -804.419306 |

|   |              |              |              |
|---|--------------|--------------|--------------|
| C | -1.522172000 | -2.907688000 | -0.199424000 |
| C | -1.323593000 | -1.487254000 | -0.170502000 |
| C | -2.479706000 | -0.620897000 | -0.066849000 |
| C | -3.777490000 | -1.200618000 | 0.016221000  |
| C | -3.938822000 | -2.585897000 | -0.004826000 |
| C | -2.802658000 | -3.442238000 | -0.114073000 |
| H | -0.638080000 | -3.545168000 | -0.287569000 |
| H | -4.649459000 | -0.542019000 | 0.095132000  |
| H | -2.945035000 | -4.527172000 | -0.133441000 |
| C | -2.243118000 | 0.791390000  | -0.066171000 |
| C | -0.962523000 | 1.305545000  | -0.164684000 |
| C | 0.145311000  | 0.343163000  | -0.239268000 |
| C | -0.648084000 | 2.796850000  | -0.193207000 |
| H | -0.003571000 | 3.044146000  | 0.672105000  |
| H | -0.009530000 | 2.989363000  | -1.073864000 |
| N | -0.050523000 | -1.001769000 | -0.238492000 |
| N | 1.396956000  | 0.878721000  | -0.399773000 |
| C | 2.569326000  | 0.218809000  | -0.128817000 |
| C | 3.751615000  | 0.774148000  | -0.729589000 |
| C | 2.731611000  | -0.905897000 | 0.754422000  |
| C | 5.009978000  | 0.211317000  | -0.504589000 |
| H | 3.626310000  | 1.642908000  | -1.381499000 |
| C | 4.002200000  | -1.440411000 | 0.990899000  |
| H | 1.855134000  | -1.325476000 | 1.246570000  |
| C | 5.145639000  | -0.900083000 | 0.358973000  |
| H | 5.893559000  | 0.639597000  | -0.988094000 |
| H | 4.110721000  | -2.287703000 | 1.675767000  |
| H | 6.133155000  | -1.331551000 | 0.548935000  |
| C | -2.629388000 | 3.855144000  | 1.073596000  |
| H | -2.144458000 | 3.651298000  | 2.033193000  |
| H | -3.642086000 | 4.268067000  | 1.095577000  |
| H | -3.102955000 | 1.462490000  | 0.018056000  |
| C | -1.858090000 | 3.768499000  | -0.210794000 |
| H | -2.536415000 | 3.524532000  | -1.053397000 |
| H | -1.451570000 | 4.775380000  | -0.466636000 |
| H | -4.940969000 | -3.020650000 | 0.059112000  |

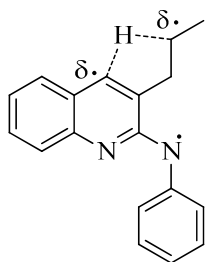

**7c\_TS<sub>βHT</sub>**

Zero-point correction= 0.276845 (Hartree/Particle)  
 Thermal correction to Energy= 0.293767  
 Thermal correction to Enthalpy= 0.294712  
 Thermal correction to Gibbs Free Energy= 0.230944  
 Sum of electronic and zero-point Energies= -804.338840  
 Sum of electronic and thermal Energies= -804.321918  
 Sum of electronic and thermal Enthalpies= -804.320974  
 Sum of electronic and thermal Free Energies= -804.384741

|   |              |              |              |
|---|--------------|--------------|--------------|
| C | 1.339949000  | -2.966346000 | -0.287292000 |
| C | 1.199893000  | -1.544313000 | -0.150026000 |
| C | 2.414915000  | -0.749213000 | 0.051549000  |
| C | 3.680507000  | -1.400302000 | 0.086493000  |
| C | 3.768924000  | -2.785116000 | -0.047135000 |
| C | 2.591096000  | -3.569017000 | -0.230997000 |
| H | 0.428373000  | -3.552766000 | -0.433255000 |
| H | 4.580991000  | -0.793839000 | 0.225544000  |
| H | 2.677504000  | -4.655210000 | -0.333525000 |
| C | 2.187457000  | 0.644083000  | 0.167426000  |
| C | 0.942586000  | 1.219073000  | 0.086219000  |
| C | -0.206890000 | 0.347576000  | -0.132893000 |
| C | 0.950589000  | 2.730182000  | 0.283451000  |
| H | 0.592744000  | 3.243158000  | -0.629165000 |
| H | 0.264350000  | 3.036879000  | 1.092835000  |
| N | -0.048746000 | -1.002048000 | -0.237044000 |
| N | -1.414919000 | 0.970319000  | -0.280510000 |
| C | -2.635085000 | 0.364797000  | -0.101622000 |
| C | -3.764844000 | 1.078410000  | -0.631813000 |
| C | -2.890215000 | -0.857102000 | 0.614019000  |
| C | -5.062531000 | 0.578466000  | -0.501416000 |
| H | -3.567447000 | 2.018060000  | -1.154821000 |
| C | -4.198520000 | -1.331520000 | 0.756839000  |
| H | -2.053581000 | -1.401152000 | 1.050473000  |
| C | -5.290144000 | -0.630661000 | 0.195412000  |
| H | -5.905261000 | 1.130175000  | -0.929711000 |
| H | -4.377143000 | -2.257506000 | 1.313151000  |
| H | -6.307976000 | -1.015328000 | 0.311752000  |

|   |             |              |              |
|---|-------------|--------------|--------------|
| C | 3.152971000 | 4.053940000  | -0.319151000 |
| H | 2.714351000 | 5.071380000  | -0.255762000 |
| H | 4.222923000 | 4.142818000  | -0.061282000 |
| H | 3.076307000 | 3.731773000  | -1.373119000 |
| C | 2.426500000 | 3.093464000  | 0.609650000  |
| H | 2.901223000 | 1.851692000  | 0.440963000  |
| H | 2.608973000 | 3.289253000  | 1.678903000  |
| H | 4.746377000 | -3.275695000 | -0.012381000 |

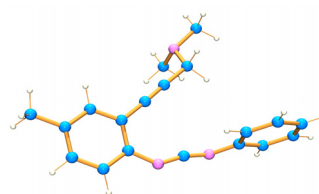

**11**

Zero-point correction= 0.324184 (Hartree/Particle)  
 Thermal correction to Energy= 0.346265  
 Thermal correction to Enthalpy= 0.347209  
 Thermal correction to Gibbs Free Energy= 0.267869  
 Sum of electronic and zero-point Energies= -898.956306  
 Sum of electronic and thermal Energies= -898.934225  
 Sum of electronic and thermal Enthalpies= -898.933281  
 Sum of electronic and thermal Free Energies= -899.012621

|   |           |           |           |
|---|-----------|-----------|-----------|
| C | -3.312500 | -2.247700 | -0.492600 |
| C | -2.150200 | -1.450300 | -0.390800 |
| C | -2.265800 | -0.111100 | 0.104800  |
| C | -3.553200 | 0.365900  | 0.475700  |
| C | -4.710200 | -0.425400 | 0.367700  |
| C | -4.567100 | -1.745400 | -0.124800 |
| H | -3.206500 | -3.268400 | -0.869400 |
| H | -3.627600 | 1.389200  | 0.855500  |
| H | -5.449200 | -2.387800 | -0.218800 |
| C | -1.127200 | 0.743600  | 0.231900  |
| C | -0.181800 | 1.515200  | 0.356100  |
| C | 0.241700  | -1.673400 | -0.855900 |
| C | 0.979800  | 2.407200  | 0.491600  |
| H | 1.286600  | 2.445300  | 1.553400  |
| H | 1.841900  | 1.966500  | -0.069400 |
| N | -0.937000 | -2.041600 | -0.777500 |
| N | 1.426200  | -1.493500 | -1.171800 |
| C | 2.616900  | -1.548400 | -0.413200 |
| C | 3.835900  | -1.299900 | -1.085300 |
| C | 2.631300  | -1.847400 | 0.972100  |
| C | 5.051300  | -1.351200 | -0.381500 |



|   |           |           |           |
|---|-----------|-----------|-----------|
| H | 3.811200  | -1.073000 | -2.154400 |
| C | 3.851900  | -1.895500 | 1.665900  |
| H | 1.688500  | -2.038300 | 1.493400  |
| C | 5.067000  | -1.648100 | 0.995500  |
| H | 5.989100  | -1.159300 | -0.912200 |
| H | 3.852700  | -2.128200 | 2.735500  |
| H | 6.014600  | -1.687500 | 1.540800  |
| C | -6.075400 | 0.115700  | 0.766500  |
| H | -6.004200 | 1.147200  | 1.148600  |
| H | -6.772000 | 0.122600  | -0.091700 |
| H | -6.539900 | -0.504200 | 1.554800  |
| N | 0.704200  | 3.802500  | 0.060700  |
| C | 0.408000  | 3.885000  | -1.381400 |
| H | 0.154400  | 4.926600  | -1.638300 |
| H | 1.269000  | 3.565000  | -2.017500 |
| H | -0.456400 | 3.246400  | -1.619800 |
| C | 1.830800  | 4.679000  | 0.423700  |
| H | 2.786300  | 4.397700  | -0.083400 |
| H | 1.586400  | 5.716700  | 0.143500  |
| H | 1.993500  | 4.645500  | 1.514200  |

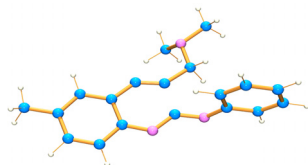

### 11\_TS<sub>MS</sub>

|                                              |                             |
|----------------------------------------------|-----------------------------|
| Zero-point correction=                       | 0.323094 (Hartree/Particle) |
| Thermal correction to Energy=                | 0.343690                    |
| Thermal correction to Enthalpy=              | 0.344635                    |
| Thermal correction to Gibbs Free Energy=     | 0.271693                    |
| Sum of electronic and zero-point Energies=   | -898.918004                 |
| Sum of electronic and thermal Energies=      | -898.897408                 |
| Sum of electronic and thermal Enthalpies=    | -898.896463                 |
| Sum of electronic and thermal Free Energies= | -898.969405                 |

|   |           |           |           |
|---|-----------|-----------|-----------|
| C | -3.131300 | -2.101600 | -0.614300 |
| C | -2.076000 | -1.158700 | -0.473300 |
| C | -2.407700 | 0.131800  | 0.113700  |
| C | -3.736400 | 0.407300  | 0.528700  |
| C | -4.759300 | -0.537700 | 0.375700  |
| C | -4.430200 | -1.795100 | -0.205200 |
| H | -2.892500 | -3.074200 | -1.052300 |
| H | -3.949800 | 1.384900  | 0.971000  |
| H | -5.217800 | -2.545700 | -0.333100 |
| C | -1.284600 | 0.972600  | 0.197100  |

|   |           |           |           |
|---|-----------|-----------|-----------|
| C | -0.031900 | 0.909900  | -0.119400 |
| C | 0.241500  | -0.722700 | -0.752400 |
| C | 1.170400  | 1.821700  | -0.175700 |
| H | 1.966500  | 1.401800  | 0.461300  |
| H | 1.567600  | 1.794500  | -1.219800 |
| N | -0.803500 | -1.499700 | -0.856700 |
| N | 1.474300  | -0.846300 | -1.161500 |
| C | 2.592000  | -1.150200 | -0.405700 |
| C | 3.865500  | -1.093600 | -1.046600 |
| C | 2.533800  | -1.566000 | 0.960800  |
| C | 5.028600  | -1.451900 | -0.352300 |
| H | 3.904500  | -0.778100 | -2.092800 |
| C | 3.706300  | -1.915400 | 1.644300  |
| H | 1.563600  | -1.613500 | 1.464000  |
| C | 4.959600  | -1.862100 | 0.996500  |
| H | 5.996300  | -1.410500 | -0.862200 |
| H | 3.645000  | -2.233900 | 2.690000  |
| H | 5.870300  | -2.136600 | 1.536700  |
| C | -6.184700 | -0.239300 | 0.815000  |
| H | -6.269500 | 0.769900  | 1.250400  |
| H | -6.889200 | -0.299500 | -0.034700 |
| H | -6.532300 | -0.963600 | 1.574200  |
| N | 0.896900  | 3.191000  | 0.291500  |
| C | 0.026400  | 3.943500  | -0.626900 |
| H | -0.164000 | 4.944500  | -0.206300 |
| H | 0.475100  | 4.067500  | -1.642400 |
| H | -0.940200 | 3.426600  | -0.735600 |
| C | 2.157000  | 3.912200  | 0.546800  |
| H | 2.778300  | 4.049400  | -0.371500 |
| H | 1.925300  | 4.909300  | 0.955800  |
| H | 2.756100  | 3.364400  | 1.292900  |

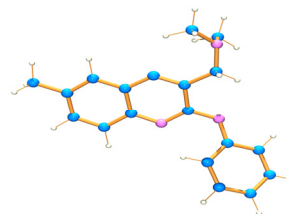

### 11\_INT<sub>MS</sub> (Singlet)

|                                            |                             |
|--------------------------------------------|-----------------------------|
| Zero-point correction=                     | 0.324272 (Hartree/Particle) |
| Thermal correction to Energy=              | 0.344664                    |
| Thermal correction to Enthalpy=            | 0.345609                    |
| Thermal correction to Gibbs Free Energy=   | 0.273433                    |
| Sum of electronic and zero-point Energies= | -898.931333                 |
| Sum of electronic and thermal Energies=    | -898.910940                 |
| Sum of electronic and thermal Enthalpies=  | -898.909996                 |

Sum of electronic and thermal Free Energies= -898.982171

|   |           |           |           |
|---|-----------|-----------|-----------|
| C | -1.618600 | -2.701800 | -0.363300 |
| C | -1.166100 | -1.351600 | -0.187000 |
| C | -2.186500 | -0.330000 | 0.088400  |
| C | -3.562200 | -0.700400 | 0.119300  |
| C | -3.970100 | -2.024500 | -0.051100 |
| C | -2.966600 | -3.021500 | -0.283300 |
| H | -0.862700 | -3.469200 | -0.552200 |
| H | -4.302500 | 0.085400  | 0.300500  |
| H | -3.277500 | -4.064300 | -0.411600 |
| C | -1.655500 | 0.962200  | 0.240900  |
| C | -0.360400 | 1.318500  | 0.154200  |
| C | 0.598700  | 0.213700  | -0.215000 |
| C | 0.241800  | 2.707300  | 0.497100  |
| H | 0.506400  | 2.727300  | 1.570800  |
| H | 1.181600  | 2.800500  | -0.069800 |
| N | 0.146400  | -1.058400 | -0.352900 |
| N | 1.882700  | 0.575400  | -0.407100 |
| C | 2.961500  | -0.235200 | -0.131800 |
| C | 4.218300  | 0.162200  | -0.697300 |
| C | 2.937100  | -1.406300 | 0.697500  |
| C | 5.373100  | -0.597200 | -0.489900 |
| H | 4.236700  | 1.066700  | -1.311600 |
| C | 4.106500  | -2.146700 | 0.910500  |
| H | 2.001100  | -1.707300 | 1.168900  |
| C | 5.327100  | -1.757800 | 0.316400  |
| H | 6.317900  | -0.286100 | -0.946700 |
| H | 4.072000  | -3.034500 | 1.550500  |
| H | 6.234800  | -2.343400 | 0.490600  |
| C | -5.436600 | -2.419900 | 0.004300  |
| H | -5.626400 | -3.151500 | 0.811400  |
| H | -6.084100 | -1.545900 | 0.182900  |
| H | -5.761600 | -2.893700 | -0.940500 |
| N | -0.619200 | 3.853900  | 0.218100  |
| C | -1.802200 | 3.921000  | 1.067100  |
| H | -2.375900 | 4.837500  | 0.851500  |
| H | -2.463600 | 3.026800  | 0.891800  |
| H | -1.506700 | 3.918600  | 2.129800  |
| C | -0.908900 | 4.075700  | -1.207600 |
| H | -1.609900 | 3.318500  | -1.623100 |
| H | -1.359400 | 5.074300  | -1.333300 |
| H | 0.029600  | 4.037400  | -1.783000 |

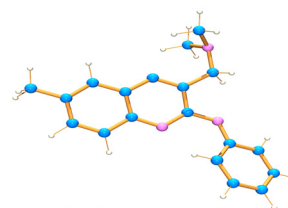

### 11\_INT<sub>MS</sub> (Triplet)

|                                              |                             |
|----------------------------------------------|-----------------------------|
| Zero-point correction=                       | 0.324984 (Hartree/Particle) |
| Thermal correction to Energy=                | 0.345300                    |
| Thermal correction to Enthalpy=              | 0.346245                    |
| Thermal correction to Gibbs Free Energy=     | 0.273119                    |
| Sum of electronic and zero-point Energies=   | -898.927767                 |
| Sum of electronic and thermal Energies=      | -898.907450                 |
| Sum of electronic and thermal Enthalpies=    | -898.906506                 |
| Sum of electronic and thermal Free Energies= | -898.979631                 |

|   |           |           |           |
|---|-----------|-----------|-----------|
| C | -1.485900 | -2.773600 | -0.241600 |
| C | -1.097600 | -1.394900 | -0.137600 |
| C | -2.158000 | -0.394200 | 0.008800  |
| C | -3.515200 | -0.820200 | 0.060100  |
| C | -3.866000 | -2.170500 | -0.033800 |
| C | -2.821900 | -3.142100 | -0.188400 |
| H | -0.694100 | -3.518300 | -0.363400 |
| H | -4.291800 | -0.056900 | 0.172400  |
| H | -3.092400 | -4.200800 | -0.267800 |
| C | -1.707700 | 0.943500  | 0.081200  |
| C | -0.406900 | 1.326800  | 0.022900  |
| C | 0.595900  | 0.234600  | -0.091200 |
| C | 0.120800  | 2.789000  | 0.071600  |
| H | 0.769100  | 2.892300  | 0.959100  |
| H | 0.776800  | 2.938900  | -0.802200 |
| N | 0.218700  | -1.069900 | -0.167100 |
| N | 1.892200  | 0.640700  | -0.185200 |
| C | 3.002500  | -0.163700 | -0.059200 |
| C | 4.232200  | 0.412300  | -0.528600 |
| C | 3.062700  | -1.464500 | 0.550800  |
| C | 5.441000  | -0.282600 | -0.435900 |
| H | 4.184900  | 1.410500  | -0.972200 |
| C | 4.285200  | -2.136800 | 0.658800  |
| H | 2.147300  | -1.913700 | 0.932400  |
| C | 5.477200  | -1.563200 | 0.160600  |
| H | 6.361700  | 0.171400  | -0.815500 |
| H | 4.316200  | -3.121300 | 1.137000  |
| H | 6.424800  | -2.103500 | 0.247400  |
| C | -5.316100 | -2.619700 | 0.020500  |
| H | -5.490700 | -3.310000 | 0.866600  |

|   |           |           |           |
|---|-----------|-----------|-----------|
| H | -6.001100 | -1.764100 | 0.135300  |
| H | -5.602600 | -3.162800 | -0.899200 |
| N | -0.871900 | 3.864700  | 0.102900  |
| C | -1.679600 | 3.903400  | 1.324900  |
| H | -2.275500 | 4.831800  | 1.343900  |
| H | -2.377600 | 3.033600  | 1.392900  |
| H | -1.019900 | 3.889600  | 2.208500  |
| C | -1.683100 | 3.970200  | -1.114100 |
| H | -2.389300 | 3.112800  | -1.225400 |
| H | -2.270900 | 4.903500  | -1.084100 |
| H | -1.025200 | 3.996600  | -1.998600 |

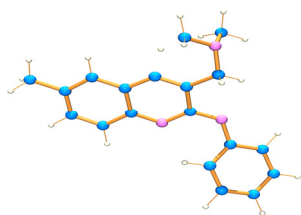

### 11\_TS<sub>7HT</sub>

|                                              |                             |
|----------------------------------------------|-----------------------------|
| Zero-point correction=                       | 0.321836 (Hartree/Particle) |
| Thermal correction to Energy=                | 0.341319                    |
| Thermal correction to Enthalpy=              | 0.342263                    |
| Thermal correction to Gibbs Free Energy=     | 0.273000                    |
| Sum of electronic and zero-point Energies=   | -898.931829                 |
| Sum of electronic and thermal Energies=      | -898.912347                 |
| Sum of electronic and thermal Enthalpies=    | -898.911403                 |
| Sum of electronic and thermal Free Energies= | -898.980666                 |

|   |           |           |           |
|---|-----------|-----------|-----------|
| C | 1.581600  | -2.695500 | -0.300200 |
| C | 1.133400  | -1.339100 | -0.153800 |
| C | 2.177900  | -0.321100 | 0.072100  |
| C | 3.551400  | -0.698400 | 0.063500  |
| C | 3.948700  | -2.027800 | -0.082300 |
| C | 2.930000  | -3.021000 | -0.251500 |
| H | 0.818300  | -3.465700 | -0.440500 |
| H | 4.301800  | 0.087300  | 0.202600  |
| H | 3.228000  | -4.070500 | -0.355400 |
| C | 1.648100  | 0.972400  | 0.202800  |
| C | 0.352100  | 1.322200  | 0.146100  |
| C | -0.639800 | 0.231500  | -0.201800 |
| C | -0.182600 | 2.715000  | 0.538900  |
| H | -1.099600 | 2.918600  | -0.032800 |
| H | -0.449900 | 2.722200  | 1.612500  |
| N | -0.174900 | -1.042600 | -0.320100 |
| N | -1.905200 | 0.621800  | -0.357200 |
| C | -3.009700 | -0.181700 | -0.122400 |

|   |           |           |           |
|---|-----------|-----------|-----------|
| C | -4.257000 | 0.280500  | -0.649800 |
| C | -3.013000 | -1.398400 | 0.632400  |
| C | -5.434000 | -0.455700 | -0.473600 |
| H | -4.257200 | 1.219800  | -1.210300 |
| C | -4.202700 | -2.118100 | 0.814900  |
| H | -2.080900 | -1.759100 | 1.068800  |
| C | -5.417800 | -1.662000 | 0.261600  |
| H | -6.372400 | -0.088700 | -0.902300 |
| H | -4.184500 | -3.044800 | 1.398400  |
| H | -6.340600 | -2.231100 | 0.410300  |
| C | 5.414300  | -2.431300 | -0.061800 |
| H | 5.708700  | -2.931100 | -1.003300 |
| H | 6.071600  | -1.556500 | 0.073400  |
| H | 5.626800  | -3.142000 | 0.758400  |
| N | 0.822900  | 3.756600  | 0.298000  |
| C | 2.037700  | 3.515600  | 1.006300  |
| H | 2.838800  | 4.220200  | 0.739100  |
| H | 1.880600  | 3.463500  | 2.096000  |
| C | 0.990300  | 4.160800  | -1.112700 |
| H | 0.003000  | 4.386000  | -1.543200 |
| H | 1.610400  | 5.070300  | -1.153000 |
| H | 1.473500  | 3.369800  | -1.721700 |
| H | 2.371500  | 2.392700  | 0.685600  |

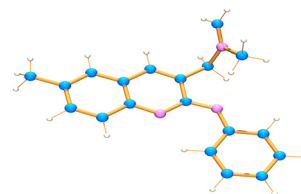

### 11\_INT<sub>7HT</sub>

|                                              |                             |
|----------------------------------------------|-----------------------------|
| Zero-point correction=                       | 0.326655 (Hartree/Particle) |
| Thermal correction to Energy=                | 0.346647                    |
| Thermal correction to Enthalpy=              | 0.347591                    |
| Thermal correction to Gibbs Free Energy=     | 0.276758                    |
| Sum of electronic and zero-point Energies=   | -898.975182                 |
| Sum of electronic and thermal Energies=      | -898.955191                 |
| Sum of electronic and thermal Enthalpies=    | -898.954247                 |
| Sum of electronic and thermal Free Energies= | -899.025079                 |

|   |           |           |           |
|---|-----------|-----------|-----------|
| C | -2.271500 | -2.293400 | 0.319900  |
| C | -1.608800 | -1.055200 | 0.014100  |
| C | -2.447700 | 0.100900  | -0.241600 |
| C | -3.868600 | -0.019700 | -0.192700 |
| C | -4.491000 | -1.231900 | 0.103900  |
| C | -3.656300 | -2.371600 | 0.359400  |
| H | -1.648300 | -3.170600 | 0.515800  |

|   |           |           |           |
|---|-----------|-----------|-----------|
| H | -4.476800 | 0.871500  | -0.393300 |
| H | -4.132900 | -3.331100 | 0.592200  |
| C | -1.767900 | 1.317200  | -0.543900 |
| C | -0.385200 | 1.361500  | -0.595100 |
| C | 0.403400  | 0.146000  | -0.305500 |
| C | 0.329700  | 2.644600  | -0.969800 |
| H | 1.333500  | 2.405900  | -1.356900 |
| H | -0.236500 | 3.239500  | -1.703600 |
| N | -0.248100 | -1.024200 | -0.017100 |
| N | 1.746000  | 0.313800  | -0.326000 |
| C | 2.710000  | -0.679400 | -0.165200 |
| C | 4.065800  | -0.216700 | -0.214000 |
| C | 2.510700  | -2.086000 | 0.029600  |
| C | 5.152000  | -1.088000 | -0.069000 |
| H | 4.230700  | 0.852800  | -0.381000 |
| C | 3.609400  | -2.950000 | 0.171700  |
| H | 1.494200  | -2.471100 | 0.069100  |
| C | 4.933800  | -2.469100 | 0.127400  |
| H | 6.173300  | -0.694000 | -0.114200 |
| H | 3.426200  | -4.020500 | 0.319100  |
| H | 5.779400  | -3.155500 | 0.238000  |
| C | -6.004300 | -1.365800 | 0.162600  |
| H | -6.344000 | -1.700500 | 1.160700  |
| H | -6.502800 | -0.406800 | -0.056700 |
| H | -6.373700 | -2.110800 | -0.566800 |
| N | 0.514900  | 3.522200  | 0.236900  |
| C | -0.199700 | 4.620300  | 0.413100  |
| H | -0.087900 | 5.195400  | 1.332600  |
| H | -0.918900 | 4.920200  | -0.348900 |
| H | -2.361200 | 2.216300  | -0.759700 |
| C | 1.521700  | 3.091300  | 1.232300  |
| H | 2.521800  | 3.394600  | 0.878500  |
| H | 1.304700  | 3.559900  | 2.203100  |
| H | 1.517700  | 1.992200  | 1.293100  |

|                                              |             |
|----------------------------------------------|-------------|
| Thermal correction to Gibbs Free Energy=     | 0.276889    |
| Sum of electronic and zero-point Energies=   | -898.966915 |
| Sum of electronic and thermal Energies=      | -898.947489 |
| Sum of electronic and thermal Enthalpies=    | -898.946545 |
| Sum of electronic and thermal Free Energies= | -899.015856 |

|   |           |           |           |
|---|-----------|-----------|-----------|
| C | 1.851400  | -2.649400 | -0.084700 |
| C | 1.327400  | -1.316600 | -0.151700 |
| C | 2.278000  | -0.226600 | -0.163700 |
| C | 3.674900  | -0.497500 | -0.103600 |
| C | 4.168600  | -1.803400 | -0.036100 |
| C | 3.222000  | -2.877400 | -0.027300 |
| H | 1.137700  | -3.478300 | -0.082300 |
| H | 4.374600  | 0.348300  | -0.116500 |
| H | 3.592700  | -3.908000 | 0.023000  |
| C | 1.732500  | 1.097100  | -0.231100 |
| C | 0.367200  | 1.286600  | -0.280100 |
| C | -0.535400 | 0.122900  | -0.280500 |
| C | -0.311600 | 2.647300  | -0.377200 |
| H | -0.420900 | 2.968800  | -1.427000 |
| H | -1.338200 | 2.534400  | 0.028400  |
| N | -0.027700 | -1.137900 | -0.198000 |
| N | -1.853500 | 0.417500  | -0.433200 |
| C | -2.897200 | -0.453000 | -0.164800 |
| C | -4.169700 | -0.103400 | -0.724000 |
| C | -2.842900 | -1.621000 | 0.666200  |
| C | -5.311100 | -0.878100 | -0.488000 |
| H | -4.218900 | 0.791900  | -1.351400 |
| C | -3.996900 | -2.381900 | 0.904700  |
| H | -1.889700 | -1.915500 | 1.103600  |
| C | -5.236500 | -2.026700 | 0.331200  |
| H | -6.266400 | -0.588400 | -0.939000 |
| H | -3.929300 | -3.268200 | 1.545600  |
| H | -6.129000 | -2.631400 | 0.521100  |
| C | 5.660600  | -2.093900 | 0.020100  |
| H | 5.990100  | -2.699300 | -0.845200 |
| H | 6.252100  | -1.162900 | 0.020700  |
| H | 5.930100  | -2.663000 | 0.929500  |
| N | 0.397900  | 3.746700  | 0.333700  |
| C | 0.735700  | 3.624400  | 1.613100  |
| H | 1.198900  | 4.464400  | 2.130200  |
| H | 0.571400  | 2.671300  | 2.113300  |
| H | 2.421700  | 1.951100  | -0.224700 |
| C | 0.524100  | 5.037500  | -0.371000 |
| H | -0.476000 | 5.474900  | -0.536100 |
| H | 1.130500  | 5.731200  | 0.228100  |
| H | 1.005500  | 4.873600  | -1.348100 |

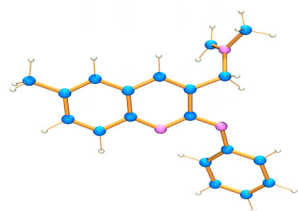

11\_TS<sub>R</sub>

|                                 |                             |
|---------------------------------|-----------------------------|
| Zero-point correction=          | 0.325830 (Hartree/Particle) |
| Thermal correction to Energy=   | 0.345256                    |
| Thermal correction to Enthalpy= | 0.346200                    |

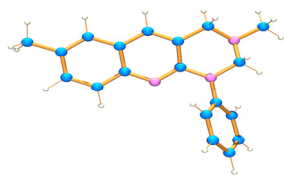

## 12

Zero-point correction= 0.330349 (Hartree/Particle)  
 Thermal correction to Energy= 0.349177  
 Thermal correction to Enthalpy= 0.350121  
 Thermal correction to Gibbs Free Energy= 0.282583  
 Sum of electronic and zero-point Energies= -899.028502  
 Sum of electronic and thermal Energies= -899.009674  
 Sum of electronic and thermal Enthalpies= -899.008729  
 Sum of electronic and thermal Free Energies= -899.076268

|   |           |           |           |
|---|-----------|-----------|-----------|
| C | -2.526800 | -1.888800 | -0.237300 |
| C | -1.801000 | -0.665500 | -0.095100 |
| C | -2.551500 | 0.558700  | 0.043800  |
| C | -3.977700 | 0.518500  | 0.037700  |
| C | -4.674800 | -0.682900 | -0.099500 |
| C | -3.917600 | -1.890600 | -0.238100 |
| H | -1.956300 | -2.815400 | -0.347300 |
| H | -4.529100 | 1.460900  | 0.143500  |
| H | -4.453100 | -2.840400 | -0.349300 |
| C | -1.792100 | 1.763200  | 0.173100  |
| C | -0.409600 | 1.738600  | 0.178100  |
| C | 0.241400  | 0.450100  | 0.036700  |
| C | 0.423700  | 3.002400  | 0.321600  |
| H | -0.085500 | 3.852300  | -0.164600 |
| H | 0.539800  | 3.269000  | 1.404300  |
| N | -0.428700 | -0.698100 | -0.100000 |
| N | 1.640000  | 0.411200  | -0.009000 |
| C | 2.380000  | -0.827900 | 0.009200  |
| C | 3.305100  | -1.089100 | -1.024300 |
| C | 2.232000  | -1.756700 | 1.062300  |
| C | 4.082100  | -2.262200 | -1.000400 |
| H | 3.399000  | -0.379000 | -1.851500 |
| C | 3.001100  | -2.933400 | 1.075100  |
| H | 1.506800  | -1.560200 | 1.854900  |
| C | 3.931300  | -3.189300 | 0.048100  |
| H | 4.793800  | -2.456400 | -1.809000 |
| H | 2.875900  | -3.650300 | 1.892800  |
| H | 4.529900  | -4.105200 | 0.063600  |
| C | -6.195400 | -0.729800 | -0.106500 |
| H | -6.584800 | -1.358400 | 0.715800  |

|   |           |           |           |
|---|-----------|-----------|-----------|
| H | -6.630300 | 0.277100  | 0.006600  |
| H | -6.582400 | -1.159200 | -1.049300 |
| N | 1.743300  | 2.819900  | -0.315500 |
| C | 2.406900  | 1.645000  | 0.258300  |
| H | 3.399300  | 1.536400  | -0.202600 |
| H | 2.557600  | 1.763000  | 1.364900  |
| H | -2.320300 | 2.720400  | 0.265100  |
| C | 2.583800  | 4.021000  | -0.187400 |
| H | 2.801600  | 4.291700  | 0.873800  |
| H | 3.540800  | 3.860900  | -0.711000 |
| H | 2.069800  | 4.873100  | -0.661400 |

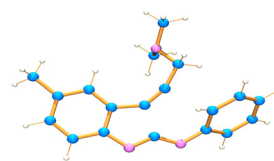

## 11\_TS<sub>DA</sub>

Zero-point correction= 0.323449 (Hartree/Particle)  
 Thermal correction to Energy= 0.343965  
 Thermal correction to Enthalpy= 0.344909  
 Thermal correction to Gibbs Free Energy= 0.272737  
 Sum of electronic and zero-point Energies= -898.914303  
 Sum of electronic and thermal Energies= -898.893787  
 Sum of electronic and thermal Enthalpies= -898.892843  
 Sum of electronic and thermal Free Energies= -898.965015

|   |           |           |           |
|---|-----------|-----------|-----------|
| C | 3.473300  | -2.251800 | -0.086400 |
| C | 2.120500  | -1.865900 | -0.075300 |
| C | 1.790000  | -0.476500 | -0.041400 |
| C | 2.785300  | 0.512100  | -0.010100 |
| C | 4.148400  | 0.129900  | -0.018200 |
| C | 4.464700  | -1.251800 | -0.051400 |
| H | 3.739400  | -3.312000 | -0.100600 |
| H | 2.504700  | 1.570100  | 0.004500  |
| H | 5.518300  | -1.553300 | -0.052100 |
| C | 0.327600  | -0.333900 | -0.086600 |
| C | -0.563300 | 0.573100  | -0.235300 |
| C | -0.097800 | -2.054300 | 0.051000  |
| C | -1.155400 | 1.915400  | -0.426200 |
| H | -1.298100 | 2.093700  | -1.508100 |
| H | -2.167200 | 1.980200  | 0.039300  |
| N | 1.014900  | -2.724700 | -0.103200 |
| N | -1.306200 | -2.364800 | 0.425000  |
| C | -2.412700 | -1.622000 | 0.132500  |
| C | -3.494000 | -1.599700 | 1.074100  |

|   |           |           |           |
|---|-----------|-----------|-----------|
| C | -2.537800 | -0.839100 | -1.067400 |
| C | -4.631200 | -0.834000 | 0.829900  |
| H | -3.392400 | -2.197700 | 1.983700  |
| C | -3.718100 | -0.090700 | -1.308700 |
| H | -1.814300 | -0.979300 | -1.872000 |
| C | -4.749600 | -0.069600 | -0.365000 |
| H | -5.445600 | -0.823500 | 1.561000  |
| H | -3.824300 | 0.455900  | -2.251500 |
| H | -5.658300 | 0.510300  | -0.553000 |
| C | 5.251700  | 1.179800  | -0.030400 |
| H | 4.864900  | 2.172700  | 0.254100  |
| H | 6.064700  | 0.920800  | 0.670900  |
| H | 5.709100  | 1.278600  | -1.033200 |
| N | -0.232700 | 2.954900  | 0.098300  |
| C | -0.266400 | 3.020400  | 1.572100  |
| H | 0.487300  | 3.745000  | 1.920600  |
| H | -1.264300 | 3.333300  | 1.962400  |
| H | -0.020500 | 2.034600  | 1.995600  |
| C | -0.507600 | 4.268500  | -0.513200 |
| H | -1.532300 | 4.649000  | -0.285500 |
| H | 0.223200  | 5.001100  | -0.133700 |
| H | -0.392400 | 4.203300  | -1.607600 |

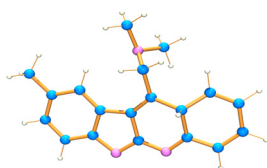

**13<sub>DA</sub>**

|                                              |                             |
|----------------------------------------------|-----------------------------|
| Zero-point correction=                       | 0.327633 (Hartree/Particle) |
| Thermal correction to Energy=                | 0.347015                    |
| Thermal correction to Enthalpy=              | 0.347959                    |
| Thermal correction to Gibbs Free Energy=     | 0.279446                    |
| Sum of electronic and zero-point Energies=   | -898.968225                 |
| Sum of electronic and thermal Energies=      | -898.948843                 |
| Sum of electronic and thermal Enthalpies=    | -898.947899                 |
| Sum of electronic and thermal Free Energies= | -899.016412                 |

|   |          |           |           |
|---|----------|-----------|-----------|
| C | 3.222100 | -2.420900 | 0.206500  |
| C | 1.892000 | -1.978500 | 0.108000  |
| C | 1.599600 | -0.582900 | -0.061900 |
| C | 2.641900 | 0.359100  | -0.108800 |
| C | 3.985700 | -0.078200 | -0.016900 |
| C | 4.252100 | -1.463900 | 0.138200  |
| H | 3.440000 | -3.484100 | 0.340000  |
| H | 2.416800 | 1.426300  | -0.175000 |

|   |           |           |           |
|---|-----------|-----------|-----------|
| H | 5.293400  | -1.796300 | 0.217500  |
| C | 0.134600  | -0.520500 | -0.148000 |
| C | -0.785600 | 0.444900  | -0.443100 |
| C | -0.287300 | -1.951300 | 0.039700  |
| C | -0.403200 | 1.869200  | -0.844500 |
| H | 0.350000  | 1.804900  | -1.652400 |
| H | -1.285500 | 2.391600  | -1.284800 |
| N | 0.736100  | -2.787200 | 0.167300  |
| N | -1.598300 | -2.366300 | 0.084800  |
| C | -2.526900 | -1.449200 | -0.114700 |
| C | -3.916400 | -1.828200 | 0.071500  |
| C | -2.245300 | -0.005300 | -0.585100 |
| C | -4.906400 | -0.882600 | 0.180600  |
| H | -4.117300 | -2.892500 | 0.222300  |
| C | -3.339000 | 0.973400  | -0.173300 |
| H | -2.386700 | -0.079800 | -1.698900 |
| C | -4.594500 | 0.539300  | 0.122900  |
| H | -5.937900 | -1.190300 | 0.378300  |
| H | -3.119900 | 2.042600  | -0.207200 |
| H | -5.385200 | 1.263000  | 0.345600  |
| C | 5.133800  | 0.920200  | -0.082400 |
| H | 4.765600  | 1.959000  | -0.049300 |
| H | 5.837800  | 0.785400  | 0.758500  |
| H | 5.719200  | 0.804000  | -1.013900 |
| N | 0.212000  | 2.675300  | 0.238300  |
| C | -0.666800 | 2.859000  | 1.406200  |
| H | -0.103700 | 3.375300  | 2.201200  |
| H | -1.575800 | 3.466300  | 1.177900  |
| H | -0.986900 | 1.879100  | 1.793200  |
| C | 0.676500  | 3.971200  | -0.283600 |
| H | -0.156500 | 4.611100  | -0.665100 |
| H | 1.193400  | 4.523400  | 0.518700  |
| H | 1.390100  | 3.809600  | -1.109300 |
